1 **Title Page**

2 *Schistosoma mansoni* infection alters the host pre-vaccination environment resulting in blunted Hepatitis  
3 B vaccination immune responses.

4  
5 Roshell Muir<sup>\*1</sup>, Talibah Metcalf<sup>\*1</sup>, Slim Fourati<sup>\*2</sup>, Yannic Bartsch<sup>3</sup>, Jacqueline Kyosiimire Lugeswa<sup>4</sup>,  
6 Glenda Canderan<sup>5</sup>, Galit Alter<sup>3</sup>, Enoch Muyanja<sup>2,6</sup>, Brenda Okech<sup>6</sup>, Teddy Namatovu<sup>6</sup>, Irene Namara<sup>6</sup>,  
7 Annemarie Namuniina<sup>6</sup>, Ali Ssetaala<sup>6</sup>, Juliet Mpendo<sup>6</sup>, Annet Nanvubya<sup>6</sup>, Paul Kato Kitandwe<sup>4</sup>, Bernard  
8 S. Bagaya<sup>7</sup>, Noah Kiwanuka<sup>8</sup>, Jacent Nassuna<sup>8</sup>, Victoria Menya Biribawa<sup>6</sup>, Alison M. Elliott<sup>4,9</sup>, Claudia J.  
9 de Dood<sup>10</sup>, William Senyonga<sup>4</sup>, Priscilla Balungi<sup>4</sup>, Pontiano Kaleebu<sup>4</sup>, Yunia Mayanja<sup>4</sup>, Mathew  
10 Odongo<sup>4</sup>, Pat Fast<sup>11,12</sup>, Matt A. Price<sup>11,13</sup>, Paul L.A.M. Corstjens<sup>14</sup>, Govert J. van Dam<sup>15</sup>, Anatoli  
11 Kamali<sup>6,11</sup>, Rafick Pierre Sekaly<sup>2</sup>, Elias K Haddad<sup>1</sup>.

12  
13 <sup>\*</sup>These three authors share first authorship.

14  
15 <sup>1</sup>Division of Infectious Diseases and HIV Medicine, Department of Medicine, Drexel University College  
16 of Medicine, Philadelphia, Pennsylvania, USA.

17 <sup>2</sup>PATRU, School of Medicine, Emory University, Atlanta, GA, USA

18 <sup>3</sup>Ragon Institute of MGH, MIT, and Harvard, Cambridge, MA, USA.

19 <sup>4</sup>MRC/UVRI and LSHTM Uganda Research Unit, Entebbe, Uganda

20 <sup>5</sup>Department of Medicine, Allergy and Immunology, University of Virginia, Charlottesville, VA, USA

21 <sup>6</sup>UVRI-IAVI HIV Vaccine Program, Entebbe, Uganda

22 <sup>7</sup>Department of Immunology and Molecular Biology, School of Biomedical Sciences, Makerere

23 University, College of Health Sciences, Kampala-Uganda

24 <sup>8</sup>Department of Epidemiology and Biostatistics, School of Public Health, Makerere University, College of  
25 Health Sciences, Kampala-Uganda

26 <sup>9</sup>Department of Clinical Research, London School of Hygiene and Tropical Medicine, London, UK

27 <sup>10</sup>Department of Cell and Chemical Biology, Leiden University Medical Center, Leiden, Netherlands

28 <sup>11</sup>International AIDS Vaccine Initiative, New York, NY, USA

29 <sup>12</sup>Pediatric Infectious Diseases, Stanford University School of Medicine, Palo Alto, CA, USA

30 <sup>13</sup>Department of Epidemiology and Biostatistics, University of California at San Francisco, San Francisco,  
31 USA

32 <sup>14</sup>Department of Cell and Chemical Biology, Leiden University Medical Center, Leiden, the Netherlands

33 <sup>15</sup>Department of Parasitology, Leiden University Medical Center, Leiden, the Netherlands

34 <sup>16</sup>IAVI, New York, New York, USA, and Nairobi, Kenya

35

36 Correspondence should be addressed to Elias K. Haddad, Ph.D., Division of Infectious Diseases and HIV  
37 Medicine, Department of Medicine, Drexel University College of Medicine, 245 N. 15<sup>th</sup> Street, MS-461,  
38 Philadelphia, Pennsylvania, 19102, USA. Telephone: E-mail: ee336@drexel.edu

39

#### 40 **Conflicts of Interest**

41 The authors have declared that no conflict of interest exists.

42

#### 43 **Short Title**

44 Schistosomiasis and Hepatitis B vaccination responses

45

46

47

48

49

50

51

## 52 **Abstract**

53 The impact of endemic infections on protective immunity is critical to inform vaccination strategies. In  
54 this study, we assessed the influence of *Schistosoma mansoni* infection on host responses in a Ugandan  
55 fishing cohort given a Hepatitis B (HepB) vaccine. Concentrations of schistosome-specific circulating  
56 anodic antigen (CAA) pre-vaccination showed a significant bimodal distribution associated with HepB  
57 titers, which were lower in individuals with high CAA. We established that participants with high CAA  
58 had significantly lower frequencies of circulating T follicular helper (cTfh) subpopulations pre- and post-  
59 vaccination and higher regulatory T cells (Tregs) post-vaccination. Polarization towards higher  
60 frequencies of Tregs: cTfh cells can be mediated by changes in the cytokine environment favoring Treg  
61 differentiation. In fact, we observed higher levels of CCL17 and soluble IL-2R pre-vaccination (important  
62 for Treg recruitment and development), in individuals with high CAA that negatively associated with  
63 HepB titers. Additionally, alterations in pre-vaccination monocyte function correlated with HepB titers,  
64 and changes in innate-related cytokines/chemokine production were associated with increasing CAA  
65 concentration. We report, that by influencing the immune landscape, schistosomiasis has the potential to  
66 modulate immune responses to HepB vaccination. These findings highlight multiple *Schistosoma*-related  
67 immune associations that could explain abrogated vaccine responses in communities with endemic  
68 infections.

69

## 70 **Author Summary**

71 Schistosomiasis drives host immune responses for optimal pathogen survival, potentially altering host  
72 responses to vaccine-related antigen. Chronic schistosomiasis and co-infection with hepatotropic viruses  
73 are common in countries where schistosomiasis is endemic. We explored the impact of *Schistosoma*  
74 *mansoni* (*S. mansoni*) infection on Hepatitis B (HepB) vaccination of individuals from a fishing  
75 community in Uganda. We demonstrate that high schistosome-specific antigen (circulating anodic  
76 antigen, CAA) concentration pre-vaccination, is associated with lower HepB antibody titers post-

77 vaccination. We show higher pre-vaccination levels of cellular and soluble factors in instances of high  
78 CAA that are negatively associated with HepB antibody titers post-vaccination, which coincided with  
79 lower frequencies of circulating T follicular helper cell populations (cTfh), proliferating antibody  
80 secreting cells (ASCs), and higher frequencies of regulatory T cells (Tregs). We also show that monocyte  
81 function is important in HepB vaccine responses, and that high CAA is associated with alterations in the  
82 early innate cytokine/chemokine microenvironment. Our findings suggest that in individuals with high  
83 CAA and likely high worm burden, schistosomiasis creates and sustains an environment that is polarized  
84 against optimal host immune responses to the vaccine, which puts many endemic communities at risk for  
85 infection against HepB and other diseases that are preventable by vaccines.

86

87

88

89

90

91

92

93

94

95

96

97

98

99

100

101

## 102 **Introduction**

103           While vaccines have reshaped public health and saved millions of lives from the threat of many  
104 infectious diseases (1), inadequate immune responses to vaccination remain a challenge, with a range of  
105 contributory causes, such as chronic illnesses, including those stemming from helminth worm infections  
106 (2-4). Schistosomiasis is a neglected tropical disease (NTD) caused by parasitic flatworms from three  
107 main *Schistosoma* spp. that often develops into a chronic infection in endemic populations, with 90% of  
108 all infections found in sub-Saharan Africa. An estimated four million people in Uganda are infected  
109 with *S. mansoni* and about 55% of the population is at risk of infection (5, 6). Currently, treatment with  
110 Praziquantel (PZQ) is the only safe and effective protocol against infection with *Schistosoma* spp. and  
111 control of Schistosomiasis in endemic regions involves periodic administration of PZQ to communities  
112 (7).

113           Chronic schistosomiasis with hepatitis B virus (HBV) and hepatitis C virus (HCV) co-infection is  
114 common in countries where schistosomiasis is endemic. There is also evidence that *S. mansoni* co-  
115 infection with hepatotropic viruses may exacerbate resultant hepatic pathology (8). In Uganda, more than  
116 1.4 million adults are chronically infected with hepatotropic viruses, and the prevalence of HBV is  
117 approximately 8.5% (9, 10) with an increased incidence in the Lake Victoria fishing communities (11).  
118 While vaccination against Hepatitis B (HepB) is highly effective in the prevention of infection, there are  
119 still ~ 800,000 deaths attributable to acute and chronic HepB disease annually (12). Furthermore, 5-10%  
120 of individuals do not mount an effective antibody response to HepB vaccination (13). There is a need for  
121 improved understanding of the immunological responses during vaccination to ensure effective responses  
122 in compromised host immune systems.

123           *Schistosoma* spp. induces strong host T helper 2 (Th2) responses, but also go on to induce  
124 regulatory T cell (Treg) responses which in turn curbs T helper immunity (14, 15). Specifically, the  
125 chronic phase develops due to continual exposure to the soluble egg antigen (SEA) of schistosome eggs

126 in the host tissues, driving immune-pathology and progressing to granuloma formation, characterized by  
127 an increase in lymphocytes (CD4<sup>+</sup> T cells) producing T-helper-2 (Th2) cytokines such as interleukins (IL)  
128 -4, -5, and -13. This heightened Th2 response becomes suppressed over time to induce tolerance, which is  
129 the major influence on worm survival in the host (16, 17). Upregulation of these responses could  
130 potentially inhibit the T helper responses induced by vaccination, such as T follicular helper (Tfh)  
131 responses which are critical for B cell help (18, 19), and foster conditions that cause alterations of  
132 vaccine-induced antibody responses. Studies showing the effects of *Schistosoma* infection on the  
133 modulation of immune responsiveness to concomitant diseases and immunization are not without  
134 controversy; however, the consensus is this infection can diminish or alter immune responses to non-  
135 schistosome antigens. These responses may lead to either beneficial or detrimental outcomes for the host.  
136 In the case of vaccine responses, animal models of malaria (20) , bacteria (21) and HepB (22) show  
137 reduced protective effects; and human vaccination studies have shown lower levels of vaccine-specific  
138 antibody in *Schistosoma*-infected children (23, 24), and in HepB vaccination of adults (25, 26). However,  
139 the impact of *S. mansoni* infection and worm burden on host immune response to vaccines, and to HepB  
140 vaccination, is still poorly understood; and the underlying actions of immune mediators affecting these  
141 responses need to be further elucidated to identify strategies to optimize vaccination effectiveness.

142         Detection of CAA (Circulating Anodic Antigen, a worm antigen regurgitated into the  
143 bloodstream of the host) in serum indicates an ongoing infection, implying the presence of living  
144 *Schistosoma* worms. CAA is produced at a steady level and although worm pairs do produce eggs, worms  
145 do not multiply and there is a direct association of CAA serum level with worm burden. It was estimated  
146 that an amount of 1-10 pg/mL blood corresponds to a single healthy worm pair (27, 28). In this study, we  
147 characterized soluble and cellular immune factors at pre- and post-immunization timepoints with a HepB  
148 vaccine in PZQ-treated individuals with high and low CAA and explored mechanisms which may be  
149 responsible for a blunted vaccine response in individuals with high CAA and likely a high worm burden.  
150 We demonstrated that *S. mansoni* infection is associated with significantly lower HepB vaccine-specific  
151 antibody responses and showed these responses coincided with alterations in cytokines and chemokines

152 that are important for Tfh and Treg cell recruitment and function. We propose that a high CAA  
153 concentration due to a high *S. mansoni* worm burden pre-vaccination, can reshape the baseline  
154 environment, and modulate the response to vaccines.

155

## 156 **Results**

### 157 **Pre-vaccination *S. mansoni* infection negatively impacts Hepatitis B antibody titers post-vaccination**

158 Seventy-five participants for the present study were recruited in Uganda among fishing  
159 communities on the northern shores of Lake Victoria, where schistosomiasis is endemic and various  
160 samples were collected at multiple timepoints for subsequent study analyses (Fig 1, S1 Table). HepB  
161 antibody titers (anti-HBs) were determined in the serum at D0, M7 (1 month post-2<sup>nd</sup> boost) and M12 (6  
162 months post-2<sup>nd</sup> boost) to look at levels pre-vaccine, as well as short-term and longer-term post-  
163 vaccination antibody responses after completion of the immunization series (Fig 1 and S1 Table). A  
164 circulating anodic antigen (CAA) detection assay (29-32) was also determined pre-vaccination (D0) in the  
165 serum of enrolled participants (Fig 1 and S1 Table). The presence of CAA indicates an ongoing *S.*  
166 *mansoni* infection, with CAA concentration closely linked to worm burden (27, 28) and those found to be  
167 infected were treated with PZQ at day 12 (D12) post-vaccination (Fig 1). The results show that CAA  
168 values displayed a bimodal distribution. The cutoff separating the two modes was estimated by  
169 maximum-likelihood which revealed that participants could be separated into those with a CAA  
170 concentration of <36 pg/mL (low or no worm burden); and those with a CAA concentration of ≥36 pg/mL  
171 (higher worm burden) (Fig 2A). Importantly, CAA values from these two groups of participants were  
172 significantly associated with HepB titers measured at month 7 (M7), where low CAA was associated with  
173 a high titer, and high CAA with a low titer (log<sub>10</sub> fold change (FC)= -0.43, 95% confidence interval (CI)  
174 [-0.053, -0.81]; P=0.028) (Fig 2B). The same trend between HepB titers and the two CAA groups  
175 was observed after adjusting for age and sex (log<sub>10</sub>FC= -0.38, 95% CI [0.059, -0.81]; P=0.089).

176 In acknowledging the role *S. mansoni* infection and worm burden could play in the modulation of  
177 host immunity, whether the individuals at the time of the study were uninfected or infected, and the level  
178 of *S. mansoni* worm burden, is important in data interpretation. For this reason, individuals were further  
179 stratified into three groups using methodology from the CAA assay that allowed detection of samples as  
180 low as 3pg/mL: non-infected (no) (CAA <3 pg/mL), low CAA concentration (low) (CAA 3-100 pg/mL)  
181 and high CAA concentration (high) (CAA >100 pg/mL) (S1 Table) (33). Association of these three  
182 groups with vaccine responses indicated higher HepB titers in non-infected individuals, followed by those  
183 with low CAA and high CAA (Fig 2C and 2D). Overall, these data show an association between CAA  
184 concentration pre-vaccination and vaccine-specific responses, specifically that that a higher CAA  
185 concentration and likely higher worm burden, can negatively influence post-vaccination antibody titers.

186

187 **Plasma cytokines/chemokines involved in lymphocyte migration and activation are significantly**  
188 **higher in *S. mansoni* infection pre-vaccination and persist at month 12 post-vaccination**

189 To elucidate any patterns of cytokine/chemokine production between infected groups pre-  
190 vaccination and post-vaccination, plasma samples from non-infected and *S. mansoni*-infected individuals  
191 were analyzed using multiplex cytokine/chemokine platform of more than 65 soluble factors. We  
192 identified that pre-vaccination systemic levels of CCL17 (no vs. low P=0.002, no vs. high P<0.0001),  
193 CCL19 (no vs. low P=0.004, no vs. high P<0.0001, low vs. high P=0.040), CXCL9 (no vs. low P=0.012,  
194 no vs. high P<0.0001, low vs. high P=0.002) (Fig 3A- 3C, S2 Table), and several other cytokines and  
195 chemokines implicated in lymphocyte recruitment and activation (S1A- S1F Fig, S2 Table), were  
196 significantly higher in individuals with low and high CAA compared to non-infected at D0. Of interest,  
197 the levels of CCL17 (no vs. high P=0.012), CCL19 (no vs. high P=0.040) and CXCL9 (no vs. high  
198 P=0.004, low vs. high P=0.031) remained significantly elevated in individuals with high CAA at M12  
199 post-vaccination (Fig 3A-3C, S2 Table). Furthermore, principal component analysis (PCA) analysis  
200 shows that cytokine/chemokine levels pre-vaccination, cluster separately from post-vaccination time  
201 points, suggesting an association between HepB vaccination and major changes in circulating



202 cytokines/chemokines that are sustained over time (up to 6 months after the last immunization, Fig 2D).  
203 The relationship between alterations in these cytokines/chemokines and the levels of HepB titers, was  
204 evaluated to identify biomarkers associated with a stronger humoral response to vaccination. Pre-  
205 vaccination ( $t=-3.01$ ,  $P=0.004$ ) and M12 post-vaccination ( $t=-2.40$ ,  $P=0.020$ ) levels of CCL17 showed a  
206 negative correlation with HepB titers at M12 (S2A and S2B Fig, S3 Table). While levels of soluble IL-2R  
207 (sIL-2R) were not different in *S. mansoni* infection compared to non-infected (S2C Fig and S2 Table),  
208 sIL-2R levels pre-vaccination ( $t=-2.22$ ,  $P=0.032$ ) and M12 post-vaccination ( $t=-2.95$ ,  $P=0.005$ ) were also  
209 negatively correlated with HepB titers at M12 (S2D and S2E Fig, S3 Table). These observations suggest a  
210 high worm burden in *S. mansoni* infection could be associated with alterations of the host  
211 cytokine/chemokine response to vaccination and implicate CCL17 and potentially sIL-2R, known to  
212 attract both effector and regulatory T cells (34-38).

213  
214 **Frequencies of circulating T follicular helper cell populations are significantly lower pre-**  
215 **vaccination which is sustained post-vaccination in *S. mansoni* infection and coincides with higher**  
216 **frequencies of regulatory T cells in individuals with high CAA concentration**

217 Cellular immunological changes influenced by the cytokine environment are key in modulating  
218 effective vaccine-specific humoral responses. We assessed frequencies of circulating T follicular helper  
219 (cTfh) populations (39), critically involved in providing B cell help in infection and vaccination (40-42),  
220 from the PBMCs of non-infected and *S. mansoni*-infected individuals by flow cytometry (S3 Fig).  
221 Frequencies of cTfh1 (low vs. high  $P=0.020$ ) and cTfh2 cells (no vs. high  $P=0.012$ , low vs. high  $P=0.014$ )  
222 pre-vaccination (Fig 4A and 4B, S4 Table), were significantly lower in individuals with high CAA; and  
223 cTfh1 cells remained significantly lower at M7 (low vs. high  $P=0.031$ ) and M12 (no vs. high  $P=0.030$ ,  
224 low vs. high  $P=0.004$ ) post-vaccination (Fig 4A, S4 Table). While differences between non-infected and  
225 *S. mansoni*-infected groups for cTfh17 cells pre-vaccination did not reach statistical significance, they  
226 were significantly lower in *S. mansoni*-infected individuals at M12 post-vaccination (no vs. low  $P=0.024$ ,  
227 no vs. high  $P=0.006$ ) (Fig 4C, S4 Table). Importantly, these alterations were specific to cTfh cells, as no

228 statistically significant changes between groups were observed at any of the time points for non-cTfh cells  
229 (Fig 4D). By contrast, frequencies of CXCR5<sup>-</sup> regulatory T cells (Tregs), that were similar between non-  
230 infected and *S. mansoni*-infected groups pre-vaccination, were significantly higher at M7 (no vs. high  
231 P=0.039) and M12 (no vs. high P=0.047) post-vaccination in individuals with high CAA (Fig 4E, S4  
232 Table). These results suggest that frequencies of cTfh cells, which are important for instructing B cells to  
233 produce antibodies, are significantly altered in instances of high worm burden, and the concomitant  
234 increase in Tregs supports the theory that worm burden could have an impact on the interplay between  
235 these two subsets.

236

237 **Antibody-secreting B cells are significantly lower in instances of high worm burden and is**  
238 **associated with Hepatitis B antibody titers at month 12**

239 Cellular changes were further examined in response to *S. mansoni* infection and HepB  
240 vaccination by looking at the frequencies of activated B cells (ABC) and antigen-specific antibody-  
241 secreting B cells (ASC) (43) (S4 Fig). Frequencies of ABCs (no vs. high P=0.048) and IgG<sup>+</sup>ABCs (no vs.  
242 high P=0.015) were found to be significantly higher pre-vaccination in individuals with high CAA, with  
243 similar results at M7 (ABC, no vs. high P=0.039; IgG<sup>+</sup>ABCs, no vs. high P=0.032) and M12 (ABC, no vs.  
244 high P=0.040; IgG<sup>+</sup>ABCs, no vs. high P=0.033) post-vaccination (S5A and S5B Fig, S5 Table), indicative  
245 of a hyperactivated inflammatory B cell response (41). Of importance and in sharp contrast, lower  
246 frequencies of KI67<sup>+</sup>ASC (no vs. high P=0.040), IgG<sup>+</sup>ASC (no vs. high P=0.046), and IgA<sup>+</sup>ASC (no vs.  
247 high P=0.029) populations were observed in individuals with high CAA at M12 post-vaccination (Fig 5A-  
248 5C). Furthermore, assessment of the correlation between ASCs and HepB titers showed a positive  
249 correlation between IgA<sup>+</sup>ASCs and HepB titers at M12 ( $t=2.10$ , P=0.041) (S5C Fig and S6 Table). These  
250 results imply that an elevated worm burden can influence humoral immunity, including isotype during  
251 vaccination, particularly by modulating changes in the B cell compartment resulting in a highly non-  
252 specific inflammatory B cell response, and a reduction in the vaccine-specific B cell response.

253

## 254 **Impact of *S. mansoni* infection on Ig isotypes**

255 B cell isotype switching changes the effector functions of antibodies and improves the  
256 effectiveness of the required response to infection or vaccination. Herein, B cell function was further  
257 investigated in the context of Ig class-switching by treating PBMCs from non-infected and *S. mansoni*-  
258 infected individuals with the TLR9 ligand CpG-ODN 2006 and analyzing the culture supernatant for Ig  
259 antibodies using a multiplex bead assay. IgG4, known to be associated with *Schistosoma* reinfection (44),  
260 was found to be the only subclass with significant differences between non-infected and *S. mansoni*-  
261 infected at pre-vaccination, and had the highest levels in the high worm burden group (no vs. high  
262  $P=0.002$ , low vs. high  $P=0.003$ ) (Fig 6A). We observed similar trends for plasma IgE pre-vaccination (no  
263 vs. high  $P=0.0008$ , low vs. high  $P=0.0001$ ); in contrast to CpG-induced IgG4, higher levels were  
264 sustained at M12 post-vaccination (no vs. high  $P=0.001$ , low vs. high  $P=0.002$ ) (S6 Fig). Furthermore, a  
265 Luminex-based serologic assay was also used to quantify pre-vaccination levels of *Schistosoma*-specific  
266 antibody isotypes and subclasses in the serum of participants, and the mean fluorescence intensity (MFI) of  
267 *S. mansoni*-specific IgG4 was found to be significantly associated with CAA concentration ( $P=0.0008$ ),  
268 with higher levels in individuals with high CAA compared to non-infected ( $P=0.0003$ ) and individuals  
269 with low CAA ( $P=0.021$ ) (Fig 6B). Post-vaccination, IgA levels in the supernatant of CPG-stimulated  
270 PBMCs were found to be significantly different between non-infected and *S. mansoni*-infected  
271 individuals, where the lowest levels were observed in individuals with high CAA (no vs. high  $P=0.031$ )  
272 (Fig 6C). The development of antigen-specific soluble IgA is thought to be critically important in an  
273 effective immune response to vaccination (45), and these results reveal that worm burden could influence  
274 the host's ability to mount a specific antibody response.

275

## 276 **Vaccine-Specific Memory CD4<sup>+</sup> T cells positively correlate with Hepatitis B antibody titers**

277 The CD4<sup>+</sup> T cell memory compartment houses both the cTfh and Treg populations, which  
278 showed variations in their frequencies in instances of *Schistosoma* infection pre- and post-vaccination  
279 (Fig 4). To determine the impact of *S. mansoni* infection on HepB-specific memory T cells, PBMCs from

280 non-infected and *S. mansoni*-infected individuals at M7 were treated with a Hepatitis B long envelope  
281 protein (HBV LEP) peptide, and CFSE<sup>-</sup> cells analyzed by flow cytometry were identified as vaccine-  
282 specific. Vaccine-specific memory CD4<sup>+</sup> T and CD8<sup>+</sup> T cells were significantly higher after peptide  
283 stimulation compared to control (DMSO), and lower frequencies of proliferating CD4<sup>+</sup> T cells, but not  
284 CD8<sup>+</sup> T cells were observed in *S. Mansoni*-infected individuals compared to non-infected (Fig 7A and  
285 7B). Interestingly, and in assessing an association with HepB titers, a positive association was observed  
286 between vaccine-specific memory CD4<sup>+</sup> T cells and HepB titers ( $t=1.85$ ,  $P=0.073$ ) (Fig 7C), with a  
287 concurrent significant negative correlation between vaccine-specific memory CD8<sup>+</sup> T cells and HepB  
288 titers ( $t=-2.36$ ,  $P=0.025$ ) (Fig 7D). These results highlight how CD4<sup>+</sup> and CD8<sup>+</sup> memory T cells may play  
289 separate and antagonistic roles in their contribution to vaccination responses during infection.

290

### 291 **Monocyte function is positively associated with effective Hepatitis B vaccine responses**

292 Our analysis has pointed to the importance of key cytokines/chemokines involved in innate  
293 responses to infection that was detected pre-vaccination, and how they may play a crucial role in  
294 modulating the immune response post-vaccination in non-infected and *S. mansoni*-infected individuals  
295 with various levels of worm burden. To additionally investigate the importance of innate responses, the  
296 frequencies of monocyte populations were determined by flow cytometry of PBMCs from non-infected  
297 and *S. mansoni*-infected participants (S7 Fig), however no differences between CAA groups were  
298 observed pre-vaccination for all three monocyte populations (S8A- S8C Fig), even though CD14<sup>+</sup>CD16<sup>-</sup>  
299 classical monocytes were found to negatively associate with HepB titers significantly at M7 (coef=-0.027,  
300  $P=0.017$ ) (S8D Fig). To further elucidate the relationship between monocyte function and HepB vaccine  
301 responses, THP-1 cells (a monocyte cell line) were used to carry out an antibody-dependent cellular  
302 phagocytosis (ADCP) assay, and ADCP was found to positively correlate with HepB titers at M12  
303 ( $P=0.0008$ ) (Fig 8A), HepB surface antigen (HbsAg)-specific IgG1 titers ( $P=0.009$ ) (Fig 8B), and binding  
304 of HbsAg-specific antibodies to the cytotoxic Fc gamma receptor 3A (FcγR3A) ( $P=0.001$ ) (Fig 8C),  
305 indicating the importance of monocyte function in an effective humoral immune response to the Hepatitis

306 B vaccine. As we did not observe any associations between monocyte subsets and CAA concentration,  
307 suggesting that monocyte frequency is not directly affected by *S. mansoni* infection, we thought it was  
308 important to further examine associations of innate immune function with CAA concentration by  
309 exploring the induction of cytokine/chemokines.

310

311 **Innate immune-related cytokines/chemokines are significantly lower pre-vaccination and day 12**  
312 **post-vaccination in instances of high CAA concentration after TLR7/8 stimulation**

313 Toll-like receptors (TLRs) mediate innate immune responses to pathogen-associated molecules  
314 (46). To investigate the importance of monocyte function in shaping the response to Hepatitis B  
315 vaccination during *S. mansoni* infection, PBMCs from non-infected and *S. mansoni*-infected individuals  
316 were stimulated with a viral toll-like receptor (TLR) 7/8 agonist- imidazoquinoline compound CLO97,  
317 and the supernatant analyzed by multiplex bead assay for cytokines/chemokines after 18 hours of  
318 stimulation. Levels of the CXC chemokine IFN- $\gamma$ -inducible protein 10 (CXCL10; IP-10), which plays a  
319 crucial role in activating innate immune cells, promoting dendritic cell (DC) maturation, and inducing  
320 protective T cell responses (47, 48), were significantly lower in CLO97-treated supernatant from the high  
321 CAA group pre-vaccination (low vs. high P=0.031) (Fig 9A, S7 Table). Furthermore, supernatant levels  
322 of CCL19 (no vs. high P=0.009), CCL26 (no vs. high P=0.014), CCL27 (no vs. high P=0.007), IL-1 $\beta$  (no  
323 vs. high P=0.028), and IL-10 (no vs. high P=0.008, low vs. high P=0.053) were also significantly lower in  
324 the high CAA group after treatment with CLO97 D12 post-vaccination (Fig 9B-9F, S7 Table).  
325 Collectively, these cytokines/chemokines play important roles in early immune responses to viral  
326 infection and vaccination including modulation of inflammatory responses and adaptive cell recruitment,  
327 activation, and regulation (49-53). These results indicate an association between *S. mansoni* infection and  
328 worm burden in the altering of the pre-vaccination, and early post-vaccination innate cytokine  
329 environment.

330

## 331 Discussion

332 Vaccination is an essential tool in controlling the spread of infectious diseases, but variations of  
333 host immune responses to vaccines across populations (endemic infections, pre-existing infections,  
334 geography, biological sex, race/ethnicity) impact the generation of protective immune responses, and thus  
335 how vaccines can be designed to treat populations are at greater risk for poor clinical outcomes. These  
336 variations in vaccine responses, seen in communities with endemic diseases such as schistosomiasis, have  
337 recently been the topic of intense investigation (3, 4). We show that pre-vaccination worm burden  
338 specifically influences levels of vaccine-specific antibody production. Individuals from a Ugandan fishing  
339 community cohort were stratified into non-infected and *S. mansoni*-infected with low worm burden (low  
340 CAA concentration), or high worm burden (high CAA concentration) (33). We show that the pre-  
341 vaccination CAA values aligned with groups categorized by low and high worm burden displayed a  
342 bimodal distribution, and that increasing CAA concentration was negatively associated with vaccine-  
343 specific antibody levels. This association also served as the premise for further investigation to delineate  
344 what molecules and cell populations were at play, and responsible for these changes in vaccine-related  
345 immune responses post-vaccination.

346 The major strength of this study lies in this unique cohort, which allowed analysis of individuals  
347 pre-vaccination and post-vaccination, with different concentrations of CAA and likely different levels of  
348 worm burden from direct exposure, or no *S. mansoni* infection at all; and allowed us to comment  
349 definitively on the impact of baseline *S. mansoni* infection on vaccine-induced responses, and more  
350 specifically if these induced responses were affected by worm burden. Notably, CAA concentration  
351 indicates an active infection and the presence of living worms, allowing for serum CAA concentration to  
352 be directly associated with worm burden (27, 28). While egg count data was determined, they are  
353 approximately 50% sensitive when done on a single stool sample (54). Furthermore, as the worms  
354 themselves do not multiply, egg count data only indicates worm pairs producing eggs and not quantitative  
355 data on overall worm burden (55). Our analysis of vaccine-specific antibody titers, cytokines/chemokines,  
356 and immune and adaptive cellular responses also allowed us to identify the links between high *S. mansoni*

357 worm burden and lower HepB vaccine responses. While the outcomes of this present study were based  
358 solely on the influence of *S. Mansoni* infection on HepB vaccination, we believe the results have the  
359 potential to direct other immunization programs in schistosomiasis-impacted communities where repeated  
360 exposure is likely.

361 Our analysis showed induction of several proinflammatory molecules involved in lymphocyte  
362 migration and activation, including CCL17 in individuals with high CAA pre-vaccination suggesting a  
363 coordinated immune response in instances of high worm burden. Higher levels of CCL17 and sIL-2R  
364 showed negative associations with HepB titers in cases of high worm burden, identifying these two  
365 molecules as potential biomarkers for inefficient antibody development. CCL17 has been shown to play a  
366 key role in recruiting CCR4-expressing T helper and regulatory cells during inflammation (34-36, 38).  
367 Furthermore, Wirnsberger and colleagues specifically show that IL-4 induces the expression of CCL17  
368 (56), and we observed higher levels of IL-4 in individuals with high CAA post-vaccination (data not  
369 shown) suggesting IL-4 may be playing a role in driving and sustaining the CCL17 responses observed.  
370 While T helper 1 and 2 responses, are predominant in Schistosomiasis (14), these chronically skewed  
371 environments have been known to be antagonistic to Tfh-B cell interactions that are important for  
372 inducing antigen-specific antibody responses (18, 19, 40). Furthermore, alterations in innate immune  
373 function in *Schistosoma* infection observed in our cohort, may potentially play a role in these shifts in  
374 these cytokine levels; and previous models have also shown that elevation of T-helper cytokines in *S.*  
375 *mansoni* infection correlate specifically with lower vaccine-specific responses to immunization against  
376 *Mycobacterium bovis* (BCG) (21), HepB and tetanus toxoid (26).

377 Several Tfh cell subsets involved in antibody induction during infection and vaccination,  
378 including cTfh cells in the periphery, play a key role the generation of high-affinity antibody-producing  
379 plasma cells and memory B cells (39). We also now know that changes observed in cTfh profiles are  
380 known to reflect the cytokine microenvironment, and specific cTfh subpopulations are known to drive B  
381 cell class switching (57). We demonstrated that individuals with high CAA had lower cTfh1 and -2 cells  
382 pre-vaccination, which was sustained post-vaccination for cTfh1 and cTfh17 cells in this group. More

383 specifically, a positive association between HepB-specific memory CD4<sup>+</sup> T cell responses and HepB-  
384 specific antibody production was observed. These data highlight the vital role of HepB-specific memory  
385 CD4<sup>+</sup> T helper cells in driving antibody responses, and that changes in this compartment directly  
386 influences vaccine responses. In parallel, we also reported higher frequencies of in Foxp3<sup>+</sup>Tregs in  
387 individuals with high CAA post-vaccination, suggesting a polarization towards higher frequencies of  
388 Tregs. These data strongly suggest that in instances of high worm burden, robust regulatory responses can  
389 be induced by key pro-Treg cytokines pre-vaccination, such as CCL17 (36, 37), and other cytokines such  
390 as IL-2 which we also observe to be elevated pre-vaccination (S1E Fig), can inhibit Tfh responses (58).  
391 We believe this environment at baseline can dictate varied changes to the T cell profile and kinetics post-  
392 vaccination and skew the ratio of Tregs: cTfh cells when there is a high worm burden. Interestingly, it has  
393 also been shown that the spleen is a major source of Tregs in hepatosplenic schistosomiasis (59), and we  
394 can hypothesize that higher frequencies of Tregs in this condition, could contribute to a diminished  
395 vaccine-induced response.

396 In support of our findings, Yin et. al. recently reported that lower responders to HepB vaccination  
397 had lower frequencies of cTfh cells and antibody-secreting plasmablasts (42); and Musaigwa and  
398 colleagues describe that *S. mansoni* infection specifically induces cell death in bone marrow plasmablasts  
399 and plasma cells (60). We show in addition to a lower frequency of cTfh cells in individuals with high  
400 CAA, a significant increase in activated B cells but a reduction in proliferating (antigen-specific) ASCs,  
401 ASCs expressing IgG and IgA, and that IgA<sup>+</sup>ASCs positively correlate with HepB titers. In addition to  
402 these data, we see a significant reduction in TLR9-induced IgA levels post-vaccination. In combination,  
403 these results point to a direct role for high worm burden environments pre-vaccination in influencing  
404 changes in the immune landscape polarizing it away from cTfh and B cell responses which would hamper  
405 vaccine-specific antibody production post-vaccination. Induction of IgA is a significant and desirable aim  
406 of vaccination for its advantageous role in mucosal responses and has been proven to be associated with  
407 protection effects post-vaccination (45, 61). We have also previously shown that changes to the cytokine  
408 microenvironment, particularly hyperinflammation, drives sustained dysregulation of the Tfh-B cell



409 interaction and hence B cell function (40, 41). Together these results emphasize that for successful  
410 vaccination, an overall efficient Tfh and B cell response is required.

411         Innate responses play critical role in shaping the adaptive immune response to vaccines. We show  
412 the importance of monocyte function in innate immune responses and desired vaccine responses to HepB.  
413 While our analysis showed higher levels of several innate proinflammatory cytokines in the plasma of  
414 individuals with high CAA, we did not observe an association between frequencies of monocyte  
415 populations and *S. mansoni* infection. However, after stimulation with a viral TLR 7/8 ligand, we show  
416 that the levels of induced cytokines varied with *S. mansoni* infection, evidenced by mixed responses pre-  
417 and 12 days post-vaccination. These findings give some indication on how pro-inflammatory innate  
418 environments could direct the disruption of efficient vaccine-specific responses during *Schistosoma*  
419 infection. Furthermore, these results suggest that innate cells are playing a distinctive functional role in  
420 changing this early cytokine/chemokine microenvironment, which we know impacts overall adaptive  
421 immunity. Specifically, induction of CXCL10 (IP-10), which plays a crucial role in the activation and  
422 recruitment of leukocytes and monocytes, promoting DC maturation and inducing protective T cell  
423 responses (47, 48), was decreased in individuals with high worm burden pre-vaccination. CXCL10 has  
424 been shown to promote the recruitment of CXCR3<sup>+</sup> cells, which not only include activated T and B cells  
425 (62, 63), but also the B-helper Tfh cells important in efficient responses to infection and vaccination (64-  
426 66). A CXCL10- inclusive signature was also associated with effective immune responses to a SARS-  
427 CoV-2 vaccine after the 1st vaccination (67), and recent vaccination studies also highlighted a link  
428 between CXCL10 levels in the serum and innate responses associated with increased vaccine-specific  
429 antibody titers (68, 69). Our data, combined with other studies, highlight a vital role for CXCL10 in  
430 modulating the early response to vaccination.

431         Notably, it has been demonstrated that deworming can enhance the host immune response to  
432 vaccination (25), and some studies have shown that PZQ treatment can partially restore vaccine-induced  
433 immune responses (60, 70). While all enrolled individuals in this current study were treated with PZQ at  
434 D12 post-vaccination (Fig 1), it is possible that *Schistosoma*-related effects on baseline immune responses

435 may have already occurred. Furthermore, the rate of reinfection and the extent to which the initial  
436 infection was cleared, is also unknown; and as this study also indicates that several proinflammatory  
437 cytokines at baseline remain elevated at month 12 post-vaccination, it is possible that individuals with a  
438 higher baseline CAA concentration get more reinfections with time, creating a cycle of high CAA  
439 concentration driving inefficient immune responses to secondary antigen. Despite these limitations, we  
440 observed differences in vaccine-induced responses in individuals with varying pre-vaccinated levels of  
441 CAA, irrespective of reported PQZ treatment. A similar observation was seen in an animal study of  
442 chronic schistosomiasis and HIV vaccination where schistosomiasis suppressed vaccine responses, and  
443 this was maintained regardless of anti-helminth treatment (71). While we know anti-helminth treatment is  
444 effective at clearing worms, results suggest that *Schistosoma* infection in this study is associated with  
445 irreversible immunomodulatory effects that can influence a host's response to unrelated antigen, such as  
446 those in vaccines.

447         In this study, we did not evaluate for transgenerational exposure to *Schistosoma*. Previous studies  
448 have shown that parasite antigen and maternal antibodies can transfer from mothers to babies in utero and  
449 during breastfeeding (72), and some studies have showed lower vaccine responses in the newborns of  
450 *Schistosoma*-infected mothers (73-75). These observations highlight the potential for different baseline  
451 immune responses in individuals with transgenerational exposure to *Schistosoma* infection and its effect  
452 on vaccine responses needs further investigation. It is also likely that some individuals are genetically  
453 more susceptible to *Schistosoma* and related hepatic fibrosis than others (76), and further understanding is  
454 needed on how susceptibility and high worm load may contribute to how these individuals mount  
455 effective vaccine responses. In this study we adjusted for age and sex but people with *Schistosoma* may  
456 be more likely to have other exposures (including other worm species, different microbiome) (77), which  
457 might influence vaccine response.

458         In summary, high worm burden in *S. mansoni* infection is associated with the dysregulation of  
459 vaccine-induced responses by the cooperation of key cytokines/chemokines that lead to elevated  
460 inflammation, and lower levels of cytokines that promote the frequency and function of innate and

461 adaptive immune subsets important in generating vaccine-specific antibodies. Furthermore, a high CCL17  
462 and low CXCL10-inclusive cytokine/chemokine signature pre-vaccination in instances of high worm  
463 burden, is also identified. The results from our study could be applied to instruct ongoing and future  
464 projects to benefit vaccination programs in *Schistosoma*- and other helminth- endemic communities,  
465 particularly in the design of studies that address specific hypotheses such as recently published study  
466 protocols from Nkurunungi and colleagues which describe the effect of a more intensive intervention with  
467 anti-helminth treatment on vaccine responses in adolescents in Uganda (78, 79).

468

## 469 **Methods**

### 470 **Study participants and design**

471 Healthy adult volunteers who were enrolled in this study were one-arm of a community-based  
472 prospective investigation that took place in fishing communities located in Entebbe, Uganda, called the  
473 Stimulated Vaccine Efficacy Trial (SiVET). SiVET was set up to identify populations and assess the  
474 implementation of efficacy trial procedures. Hepatitis B and typhoid vaccines were selected as simulated  
475 vaccines due to the potential benefit to the fishing communities. Participants aged 18 to 49 years, males  
476 and non-pregnant females were enrolled starting in 2015 from one mainland lakeshore fishing community  
477 and one island community along Lake Victoria, in Wakiso district. (S1 Table). Inclusion criteria  
478 encompassed HIV-uninfected, negative Hep B surface antigen (HbsAg) and core antibody tests,  
479 capability, and willingness to provide written informed consent to receive HBV vaccine, and consent for  
480 follow-up leading up to 12 months after the first study immunization. Volunteers were not prescreened for  
481 active malaria and latent TB infections. Samples from 75 volunteers were available to be used for this  
482 present sub-study with the objective to explore predictors of immune responses, (including parasite  
483 burden, microbiome, effect of diet on microbiome) and to explore novel methods to identify predictors of  
484 vaccine response and pathways activated in effective vaccine immune responses. Adults were screened up  
485 to 6 weeks before the first study injection of the Hepatitis B vaccine ENGERIX-B (GlaxoSmithKline  
486 Biologicals, derived from recombinant subunit Hepatitis B surface antigen adsorbed on aluminum

487 hydroxide) followed by two booster doses given at months 1 and 6 (Fig 1). Doses were given  
488 intramuscularly in the deltoid muscle at 1mL volume containing 20 µg of the vaccine. Whole blood and  
489 plasma were collected pre-vaccination (D0), post-1<sup>st</sup> injection (D3, D7, and D12), and post-booster  
490 injections on the day the infections were administered (M1 and M6) (Fig 1). Volunteers were treated at  
491 day 12 with Praziquantel (PZQ) as appropriate, for egg counts detected in stool samples at enrollment,  
492 D3, and/or D7 (Fig 1). *Schistosoma*-infected participants received 40mg/kg body weight single dose  
493 (average 2.4 g) of PZQ.

494

#### 495 **Treatment of *S. mansoni*-infected enrolled individuals**

496 Stool samples were collected from enrollees' pre-vaccination (D0), prior to the first dose of the  
497 HepB vaccine, and at D3 and D7 post-vaccination. *Schistosoma* egg counts were subsequently conducted  
498 and if stool sample/s were positive, PZQ treatment was administered at D12 post-vaccination. Egg count  
499 results were available within one week, after which any infected individuals were treated.

500

#### 501 **Circulating anodic antigen (CAA) assay**

502 The circulating anodic antigen assay (CAA) was performed pre-vaccination (Day 0) on serum  
503 samples from enrolled participants to reveal ongoing *Schistosoma* infection (29-32). Human negative  
504 serum (Sanquin, blood donors, the Netherlands) was spiked with a known concentration of CAA and  
505 dilutions made up to eight standard points to provide an appropriate standard series. An extra negative  
506 serum sample was included as a duplicate negative control. Samples were evaluated using the SCAA500  
507 protocol with a lower limit of detection threshold of 3pg/mL; 500 µL serum and standards were extracted  
508 with an equal volume of 4% w/v trichloroacetic acid (TCA; Merck Life Science NV, the Netherlands),  
509 vortexed and incubated at ambient temperature for five minutes. Thereafter, samples and standards were  
510 briefly vortexed and spun at 13000g for five minutes and 0.5 mL of clear supernatant was concentrated to  
511 20 µL using Amicon Ultra-0.5 Centrifugal Filter Units devices with a molecular weight cut-off of 10 kDa  
512 (Merck Life Science N.V., the Netherlands). Note, for samples with insufficient serum volumes the

513 SCAA20 test format was used which requires only 20uL serum and no concentration step but has a lower  
514 limit of detection threshold of 30pg/mL. The resulting TCA soluble fraction (20µL) was added to wells  
515 containing 100 ng dry UCP particles (80) (400 nm Y<sub>2</sub>O<sub>2</sub>S:Yb<sup>3+</sup>,Er<sup>3+</sup>) coated with mouse monoclonal anti-  
516 CAA antibodies (32) hydrated with 100 mL of high salt lateral flow buffer (HSFS: 200 mM Tris pH8,  
517 270 mM NaCl, 0.5% (v/v) Tween-20, 1% (w/v) BSA. After incubated for one hour at 37°C while shaking  
518 at 900rpm the CAA lateral flow strips (32) were placed in the wells, and samples allowed to flow. The  
519 strips were then dried overnight and analyzed using an Upcon reader (Labrox Oy, Turku, Finland). The  
520 test line signals (T; relative fluorescent units, peak area) were normalized to the flow control signals (FC)  
521 of the individual strips and the results expressed as Ratio value (R=T/FC).

522

### 523 **Whole blood processing and sample storage**

524 PBMCs isolation/storage: Whole Blood collected in NaHeparin tube (BD, NJ, USA) was layered  
525 over 20ml of Histopaque (Sigma-Aldrich, Darmstadt, Germany) and centrifuged at 400g for 40 minutes at  
526 room temperature with no centrifuge brakes. Lymphocytes, platelets, and monocytes found at the plasma-  
527 separating medium interface (buffy coat) were recovered and washed in Hanks Balanced Salt solution to  
528 remove contaminating platelets, separation media and plasma. The resulting PBMCs (lymphocytes and  
529 monocytes) were resuspended in complete RPMI media (RPMI 1640 media supplemented with 10% Fetal  
530 Bovine Serum (FBS), 10mM Hepes buffer, 2mM L-glutamine, 1mM sodium pyruvate and 1X penicillin-  
531 streptomycin) for counting and concentrated at 10million cells/mL/ vial in FBS with 10% DMSO, frozen  
532 down using a rate-controlled freezer and stored in liquid nitrogen.

533 **Serum separation:** Specific vacutainers for serum (SST, Plymouth UK) were invert twice to mix  
534 blood and then centrifuged at 1200 g for 10 minutes at room temperature with maximum acceleration and  
535 brake after which aliquots into pre-labeled cryovials were made and stored at below -70°C.

536 **Plasma separation:** Plasma from the separation tube of PBMCs was harvested and then  
537 centrifuged at 1800 g for 20 minutes at room temperature with maximum acceleration and brake after

538 which aliquots into pre-labeled cryovials without disturbing the platelet pellet at the bottom of the tube  
539 and stored at below  $-70^{\circ}\text{C}$ .

540

#### 541 **Hepatitis B antibody testing**

542 Each serum sample was assayed at screening using three different HBV infection tests for:  
543 Hepatitis B surface antigen (HbsAg), Hepatitis B core antibody (anti-HBc), and Hepatitis B surface  
544 antibody (anti-HBs). The HbsAg and antiHBc antibodies were tested for using the VIDAS HbsAg Ultra  
545 and VIDAS anti-HBc Total II (Biomerieux SA, France) kits respectively on the MinVidas analyzer. The  
546 anti-HBs testing was done using the Cobas e 411 analyzer (Roche Diagnostics, Mannheim, Germany).  
547 The anti-HBs titer cut off value was 10IU/L. All three tests were used only at screening to differentiate  
548 between possible past exposure from active infection, and to ensure only HepB-negative individuals were  
549 recruited and administered the vaccine. Measurement of anti-HBs antibody was conducted for all  
550 subsequent follow-up visits.

551

#### 552 **PBMC culture**

553 PBMCs from non-infected and *S. mansoni*-infected individuals pre-vaccination and post-  
554 vaccination were thawed and rested for 3 hours before being placed into culture. Samples were used for  
555 ex-vivo immunostaining and flow cytometry analysis, and for TLR stimulation assays. PBMCs were  
556 suspended in RPMI medium supplemented with L-glutamine (Corning Cellgro, Manassas, VA, USA),  
557 10% FBS and 1 X [50 U] penicillin-streptomycin (Invitrogen, Carlsbad, CA, USA) (R10F).  $1 \times 10^6$  cells  
558 were added to 5-ml polypropylene tubes for CLO97 stimulation (Imidazoquinoline Compound; TLR7/8  
559 agonist) (Invivogen, San Diego, CA, USA), and  $0.5 \times 10^6$  cells added to the wells of 96-well U-bottom  
560 plates for CpG-ODN 2006 stimulation (TLR9 agonist) (Invivogen). Optimal concentration for CLO97  
561 stimulation was selected as previously described (81). CpG-ODN 2006 was titrated on CFSE-labeled  
562 PBMCs, and optimal TLR9 activity assessed on proliferating CD19<sup>+</sup> cells by flow cytometry. Cells were  
563 allowed to rest at  $37^{\circ}\text{C}$  under a 5%  $\text{CO}_2$  atmosphere for 3 hours prior to addition of TLR agonists at the

564 following concentrations: CLO97 (0.5ug/ml) and CpG (1ug/ml). Cells were cultured also at 37°C under a  
565 5% CO<sup>2</sup> atmosphere for 18hrs (CLO97), and 7 days (CpG-ODN 2006). After culture, PBMCs were  
566 collected and washed in preparation for analysis by multiplex immunoassays or flow cytometry. For HBV  
567 peptide stimulation, PBMCs were first labeled with CFSE using a Cell Trace™ CFSE cell proliferation  
568 kit (ThermoFisher Scientific, Waltham, MA, USA), and rested for 3 hours in the conditions described  
569 above. In a 96-well deep well plate (USA Scientific, Ocala, FL, USA), 2 x 10<sup>6</sup> cells in 1mL RPMI  
570 medium supplemented with 8% human serum (Access Biologicals, Vista, CA, USA), 1% penicillin-  
571 streptomycin and 10ng/mL IL-2 (Miltenyi Biotec, Auburn, CA, USA) (R8H-IL-2) were stimulated with  
572 either Pepmix™ HBV (Large envelope protein) (JPT Peptide Technologies, Berlin, Germany) at 1ug/mL  
573 or control (R8H-IL-2 with 0.2% DMSO) on Day 1 and cultured in the conditions described above. On  
574 Day 3, cells were supplemented with fresh R8H-IL-2 by half media replacement; and on Day 6, PBMCs  
575 were collected and washed in preparation for measurement of immune recall responses by flow  
576 cytometry.

577

#### 578 **Cytokine and chemokine analysis (multiplex immunoassay)**

579 Plasma collected from whole blood and supernatant collected from stimulated PBMCs were  
580 analyzed for chemokines/cytokines and Ig isotypes using magnetic bead multiplex assays. The following  
581 human analyte premixed panels were used: Bio-Plex human chemokine panel (Bio-Rad, Hercules, CA,  
582 USA): I-309 (CCL1), MCP-1 (CCL2), MIP-1 $\alpha$  (CCL3), MCP-3 (CCL7), MCP-2 (CCL8), Eotaxin  
583 (CCL11), MCP-4 (CCL13), MIP-1 $\alpha$  (CCL15), TARC (CCL17), MIP-3 $\beta$  (CCL19), 6Ckine (CCL21),  
584 MIP-3 $\alpha$  (CCL20), MDC (CCL22), MPIF-1 (CCL23), Eotaxin-2 (CCL24), TECK (CCL25), Eotaxin-3  
585 (CCL26), CTACK (CCL27), GM-CSF, GRO- $\alpha$  (CXCL1), GRO- $\beta$  (CXCL2), ENA-78 (CXCL5), GCP-2  
586 (CXCL6), MIG (CXCL9), IP-10 (CXCL10), I-TAC (CXCL11), SDF-1A+ $\beta$  (CXCL12), BCA-1  
587 (CXCL13), SCYB16 (CXCL16), Fractalkine (CX3CL1), MIF, IL-1 $\beta$ , IL-2, IL-4, IL-6, IL-8, IL-10, IL-  
588 16, TNF- $\alpha$ , and IFN- $\gamma$ . Custom ProcartaPlex 34-plex (ThermoFisher Scientific): APRIL, BAFF, CD30,  
589 CD40L, G-CSF, IFN-A, IL-12P70, IL-13, IL-15, IL-16, IL-17A, IL-18, IL-1A, IL-20, IL-21, IL-22, IL-

590 23, IL-27, IL-2R, IL-3, IL-31, IL-5, IL-7, IL-9, LIF, M-CSF, TNF-R2, TNF-B, TRAIL, TSLP, TWEAK,  
591 VEGF-A, IFNB, and IL-29/IFN-lambda1. Bio-Plex human isotype panel (Bio-Rad): IgM, IgA, IgG1,  
592 IgG2, IgG3, IgG4. IgE was measured using Bio-Plex human IgE isotype assay (Bio-Rad). The  
593 manufacturer's protocol was followed. Data was acquired on a Bio-Plex 200 system (using bead regions  
594 defined in the protocol) and analyzed with the Bio-Plex Manager 6.1 software (Bio-Rad).

595

### 596 **Flow cytometry analysis of PBMCs**

597 For ex-vivo analysis,  $1 \times 10^6$  PBMCs per well were incubated with Fixable aqua viability stain  
598 405 (ThermoFisher Scientific) to discriminate dead from live cells then stained with antibody panels  
599 described (S8 and S9 Tables). To detect intracellular expression of markers, cells were fixed and  
600 permeabilized using the Foxp3/Transcription factor staining buffer set (ThermoFisher Scientific) and  
601 immunostained using FOXP3-FITC (clone, PCH101) (ThermoFisher Scientific) (S8 Table) and KI67-  
602 FITC (BD Biosciences, San Jose, CA, USA) (S9 Table). Following HBV peptide stimulation, PBMCs  
603 were stained with the surface antibody panel described (S10 Table), then stained with 7-AAD (BD  
604 Biosciences) for 10 minutes prior to analysis to discriminate dead from live cells. Flow cytometry  
605 measurements were made on a BD LSRFortessa™ (BD Biosciences) and collected data analyzed using  
606 FlowJo software version 10.7.1 (BD).

607

### 608 **Antibody-dependent cellular phagocytosis (ADCP) assay**

609 An antibody-dependent cellular phagocytosis (ADCP) assay to investigate monocyte function  
610 was conducted. HbsAg was biotinylated using an EZ-Link™ Sulfo-NHS-LC-Biotinylation Kit  
611 (ThermoFisher Scientific) and coupled to FluoSpheres™ NeutrAvidin™-Labeled Microspheres  
612 (ThermoFisher Scientific). To form immune complexes, antigen-coupled beads were incubated for 2  
613 hours at 37°C with 1:25 diluted serum samples and then washed to remove unbound immunoglobulin.  
614 After washing, immune complexes were incubated for 16-18 hours with a monocyte cell line, THP-1 cells  
615 [25,000 THP-1 cells per well at a concentration of  $1.25 \times 10^5$  cells/ml in RPMI (ThermoFisher Scientific)



616 + 10% FBS (Sigma-Aldrich), and following incubation, cells were fixed with 4% paraformaldehyde (Poly  
617 Scientific R&D, Bay Shore, NY, USA). Percentage of fluorosphere positive cells was analyzed on a  
618 LSRII flow cytometer (BD Biosciences). The phagocytosis score was defined.

619

#### 620 **Antibody subclass and Fc receptor binding**

621 HbSAg-specific antibody subclass titers and Fc receptor binding profiles were analyzed with a  
622 custom multiplex Luminex assay as described previously (82). In brief, HbSAg was coupled to magnetic  
623 Luminex beads (Luminex Corp, TX, USA). Coupled beads were incubated with diluted serum samples,  
624 washed, and IgG subclasses detected with a 1:100 diluted PE-conjugated secondary antibody for IgG1  
625 (clone: HP6001; Southern Biotech, AL, USA). For the Fc $\gamma$ R binding, a respective PE-streptavidin  
626 (Agilent Technologies, Santa Clara, CA, USA) coupled recombinant and biotinylated human Fc $\gamma$ R  
627 protein was used as a secondary probe.

628

#### 629 **Statistics**

630 Statistical inference evaluating the differences of HepB titers between non-infected versus low  
631 CAA, non-infected versus high CAA and low CAA versus high CAA was determined using Wilcoxon  
632 rank-sum test. Wilcoxon rank-sum tests were performed on non-infected vs. low CAA, or non-infected  
633 vs. high CAA, or low CAA vs. high CAA within each time point for plasma Luminex assays, and ex-vivo  
634 flow cytometry analysis. Pairwise Wilcoxon signed rank test were performed on untreated vs. treated for  
635 each non-infected, or low CAA, or high CAA for CpG, HBV-LEP and CLO97 stimulation assays; and  
636 within the treated groups, a Wilcoxon rank-sum test was conducted on non-infected vs. low CAA, or non-  
637 infected vs. high CAA, or low CAA vs. high CAA. Linear regression analyses were adjusted for sex (no  
638 significant association between age and HepB titers) and student t-tests were used to evaluate for the  
639 significance of the association. Sensitivity analyses were performed using the R package sensemakr (83)  
640 used to assess the robustness of the results of the linear regression analysis to an unobserved confounding

641 variable. Benjamini-Hochberg adjustment was used to control for multiple testing for each assay.  $P \leq 0.05$   
642 was considered significant for all analyses.

643

#### 644 **Study approval**

645 Informed consent was obtained from all participants prior to being enrolled in the studies. All  
646 studies were approved by the Uganda Virus Research Institute Research Ethics Committee, reference  
647 number GC/127/15/07/439 and the Uganda National Council of Science and Technology, reference  
648 number HS 1850.

649

#### 650 **Author contributions**

651 RM, TM, and SF share first authorship. RM and TM are first and second co-authors respectively,  
652 as they conceptualized, designed, and performed experiments, analyzed data, and wrote the manuscript.  
653 SF is the third co-author and analyzed data and wrote the manuscript. AK, NK, A Nanvubya, PK, BSB  
654 and YM designed the SiVET clinical study. AK, AE, PK, JKL and BSB conceptualized the SiVET study.  
655 YB, JKL, GC, GA, EM, BO, TN, IN, A Namuniina, AS, JM, PKK, VMB, BSB, NK, JN, WS, CJDD, PB  
656 and MO performed experiments and analyzed data. PLAMC and GJVD designed clinical assays and  
657 PLAMC edited the manuscript. EM, BO, TN, IN, AN, AS, JM, PKK, and NK managed enrollee  
658 recruitment and participation in the study. PF, MAP, AME, and RPS provided conceptual advice and  
659 edited the manuscript. EKH conceptualized experiments and wrote the manuscript. All authors reviewed  
660 and approved the manuscript. RM and EKH had final responsibility for the decision to submit for  
661 publication.

662

#### 663 **Acknowledgements**

664 This work was supported by NIH funding as part of Human Immune Project Consortium (HIPC)  
665 to EKH and RPS #U19 AI128910. The SiVET was supported by a grant from the United States Agency

666 for International Development (USAID) [USAID reference number AID-OAA-A-16-00032]. The  
667 contents are the responsibility of the authors and does not necessarily reflect the views of USAID or the  
668 United States Government. We are grateful to the study participants, and healthcare and research staff  
669 from the Immunomodulation and Vaccines Programme and the Pathogen Genomics Phenotype and  
670 Immunity Programme at the MRC/UVRI and LSHTM Uganda Research Unit, the UVRI-IAVI HIV  
671 Vaccine Program at the College of Health Sciences at Makerere University, Kampala-Uganda, and the  
672 International AIDS Vaccine initiative, for the invaluable contribution to this study.

673

## 674 **References**

675

- 676 1. Pollard AJ, Bijker EM. A guide to vaccinology: from basic principles to new  
677 developments. *Nat Rev Immunol*. 2021;21(2):83-100.
- 678 2. Zimmermann P, Curtis N. Factors That Influence the Immune Response to Vaccination.  
679 *Clin Microbiol Rev*. 2019;32(2).
- 680 3. Driciru E, Koopman JPR, Cose S, Siddiqui AA, Yazdanbakhsh M, Elliott AM, et al.  
681 Immunological Considerations for Schistosoma Vaccine Development: Transitioning to Endemic  
682 Settings. *Front Immunol*. 2021;12:635985.
- 683 4. Nono JK, Kamdem SD, Musaigwa F, Nnaji CA, Brombacher F. Influence of  
684 schistosomiasis on host vaccine responses. *Trends Parasitol*. 2022;38(1):67-79.
- 685 5. Ssali A, Pickering L, Nalwadda E, Mujumbusi L, Seeley J, Lambertson PHL.  
686 Schistosomiasis messaging in endemic communities: Lessons and implications for interventions  
687 from rural Uganda, a rapid ethnographic assessment study. *PLoS Negl Trop Dis*.  
688 2021;15(10):e0009893.
- 689 6. Loewenberg S. Uganda's struggle with schistosomiasis. *Lancet*. 2014;383(9930):1707-8.
- 690 7. World Health Organization. Assessing the Efficacy of Anthelmintic Drugs against  
691 Schistosomiasis and Soil-Transmitted Helminthiasis . Geneva, Switzerland: World Health  
692 Organization. <https://apps.who.int/iris/handle/10665/79019> Accessed on 06/16/2022. 2013.
- 693 8. Omar HH. Impact of chronic schistosomiasis and HBV/HCV co-infection on the liver:  
694 current perspectives. *Hepat Med*. 2019;11:131-6.
- 695 9. Bwogi J, Braka F, Makumbi I, Mishra V, Bakamutumaho B, Nanyunja M, et al. Hepatitis  
696 B infection is highly endemic in Uganda: findings from a national serosurvey. *Afr Health Sci*.  
697 2009;9(2):98-108.
- 698 10. Kafeero HM, Ndagire D, Ocamo P, Kudamba A, Walusansa A, Sendagire H. Prevalence  
699 and predictors of hepatitis B virus (HBV) infection in east Africa: evidence from a systematic  
700 review and meta-analysis of epidemiological studies published from 2005 to 2020. *Arch Public*  
701 *Health*. 2021;79(1):167.

- 702 11. Kitandwe PK, Muyanja E, Nakaweesa T, Nanvubya A, Ssetaala A, Mpendo J, et al.  
703 Hepatitis B prevalence and incidence in the fishing communities of Lake Victoria, Uganda: a  
704 retrospective cohort study. *BMC Public Health*. 2021;21(1):394.
- 705 12. Pattyn J, Hendrickx G, Vorsters A, Van Damme P. Hepatitis B Vaccines. *J Infect Dis*.  
706 2021;224(12 Suppl 2):S343-S51.
- 707 13. Walayat S, Ahmed Z, Martin D, Puli S, Cashman M, Dhillon S. Recent advances in  
708 vaccination of non-responders to standard dose hepatitis B virus vaccine. *World J Hepatol*.  
709 2015;7(24):2503-9.
- 710 14. Kamdem SD, Moyou-Somo R, Brombacher F, Nono JK. Host Regulators of Liver  
711 Fibrosis During Human Schistosomiasis. *Front Immunol*. 2018;9:2781.
- 712 15. Angeles JMM, Mercado VJP, Rivera PT. Behind Enemy Lines: Immunomodulatory  
713 Armamentarium of the Schistosome Parasite. *Front Immunol*. 2020;11:1018.
- 714 16. Zheng B, Zhang J, Chen H, Nie H, Miller H, Gong Q, et al. T Lymphocyte-Mediated  
715 Liver Immunopathology of Schistosomiasis. *Front Immunol*. 2020;11:61.
- 716 17. Lundy SK, Lukacs NW. Chronic schistosome infection leads to modulation of granuloma  
717 formation and systemic immune suppression. *Front Immunol*. 2013;4:39.
- 718 18. Vinuesa CG, Linterman MA, Yu D, MacLennan IC. Follicular Helper T Cells. *Annu Rev*  
719 *Immunol*. 2016;34:335-68.
- 720 19. Crotty S. T Follicular Helper Cell Biology: A Decade of Discovery and Diseases.  
721 *Immunity*. 2019;50(5):1132-48.
- 722 20. Su Z, Segura M, Stevenson MM. Reduced protective efficacy of a blood-stage malaria  
723 vaccine by concurrent nematode infection. *Infect Immun*. 2006;74(4):2138-44.
- 724 21. Elias D, Akuffo H, Pawlowski A, Haile M, Schon T, Britton S. *Schistosoma mansoni*  
725 infection reduces the protective efficacy of BCG vaccination against virulent *Mycobacterium*  
726 *tuberculosis*. *Vaccine*. 2005;23(11):1326-34.
- 727 22. Chen L, Liu WQ, Lei JH, Guan F, Li MJ, Song WJ, et al. Chronic *Schistosoma*  
728 *japonicum* infection reduces immune response to vaccine against hepatitis B in mice. *PLoS One*.  
729 2012;7(12):e51512.
- 730 23. Nono JK, Kamdem SD, Netongo PM, Dabee S, Schomaker M, Oumarou A, et al.  
731 Schistosomiasis Burden and Its Association With Lower Measles Vaccine Responses in School  
732 Children From Rural Cameroon. *Front Immunol*. 2018;9:2295.
- 733 24. Tweyongyere R, Nassanga BR, Muhwezi A, Odongo M, Lule SA, Nsubuga RN, et al.  
734 Effect of *Schistosoma mansoni* infection and its treatment on antibody responses to measles  
735 catch-up immunisation in pre-school children: A randomised trial. *PLoS Negl Trop Dis*.  
736 2019;13(2):e0007157.
- 737 25. Song WJ, Cheng YL, Liu LZ, Kong Z, Hu S, Liu K, et al. [Impact of chronic  
738 schistosomiasis japonica on the protective immunity induced by vaccine against hepatitis B  
739 virus]. *Zhongguo Ji Sheng Chong Xue Yu Ji Sheng Chong Bing Za Zhi*. 2005;23(3):163-5.
- 740 26. Riner DK, Ndombi EM, Carter JM, Omondi A, Kittur N, Kavere E, et al. *Schistosoma*  
741 *mansoni* Infection Can Jeopardize the Duration of Protective Levels of Antibody Responses to  
742 Immunizations against Hepatitis B and Tetanus Toxoid. *PLoS Negl Trop Dis*.  
743 2016;10(12):e0005180.
- 744 27. Alan Wilson R, van Dam GJ, Kariuki TM, Farah IO, Deelder AM, Coulson PS. The  
745 detection limits for estimates of infection intensity in schistosomiasis mansoni established by a  
746 study in non-human primates. *Int J Parasitol*. 2006;36(12):1241-4.

- 747 28. van Dam GJ, Bogitsh BJ, van Zeyl RJ, Rotmans JP, Deelder AM. *Schistosoma mansoni*:  
748 in vitro and in vivo excretion of CAA and CCA by developing schistosomula and adult worms. *J*  
749 *Parasitol.* 1996;82(4):557-64.
- 750 29. Corstjens P, de Dood CJ, Knopp S, Clements MN, Ortu G, Umulisa I, et al. Circulating  
751 Anodic Antigen (CAA): A Highly Sensitive Diagnostic Biomarker to Detect Active *Schistosoma*  
752 Infections-Improvement and Use during SCORE. *Am J Trop Med Hyg.* 2020;103(1\_Suppl):50-  
753 7.
- 754 30. Corstjens P, Hoekstra PT, de Dood CJ, van Dam GJ. Utilizing the ultrasensitive  
755 *Schistosoma* up-converting phosphor lateral flow circulating anodic antigen (UCP-LF CAA)  
756 assay for sample pooling-strategies. *Infect Dis Poverty.* 2017;6(1):155.
- 757 31. Corstjens PL, De Dood CJ, Kornelis D, Fat EM, Wilson RA, Kariuki TM, et al. Tools for  
758 diagnosis, monitoring and screening of *Schistosoma* infections utilizing lateral-flow based assays  
759 and upconverting phosphor labels. *Parasitology.* 2014;141(14):1841-55.
- 760 32. Corstjens PL, van Lieshout L, Zuiderwijk M, Kornelis D, Tanke HJ, Deelder AM, et al.  
761 Up-converting phosphor technology-based lateral flow assay for detection of *Schistosoma*  
762 circulating anodic antigen in serum. *J Clin Microbiol.* 2008;46(1):171-6.
- 763 33. Corstjens PL, Nyakundi RK, de Dood CJ, Kariuki TM, Ochola EA, Karanja DM, et al.  
764 Improved sensitivity of the urine CAA lateral-flow assay for diagnosing active *Schistosoma*  
765 infections by using larger sample volumes. *Parasit Vectors.* 2015;8:241.
- 766 34. Imai T, Nagira M, Takagi S, Kakizaki M, Nishimura M, Wang J, et al. Selective  
767 recruitment of CCR4-bearing Th2 cells toward antigen-presenting cells by the CC chemokines  
768 thymus and activation-regulated chemokine and macrophage-derived chemokine. *Int Immunol.*  
769 1999;11(1):81-8.
- 770 35. Lieberam I, Forster I. The murine beta-chemokine TARC is expressed by subsets of  
771 dendritic cells and attracts primed CD4+ T cells. *Eur J Immunol.* 1999;29(9):2684-94.
- 772 36. Mizukami Y, Kono K, Kawaguchi Y, Akaike H, Kamimura K, Sugai H, et al. CCL17 and  
773 CCL22 chemokines within tumor microenvironment are related to accumulation of Foxp3+  
774 regulatory T cells in gastric cancer. *Int J Cancer.* 2008;122(10):2286-93.
- 775 37. Sharma A, Rudra D. Emerging Functions of Regulatory T Cells in Tissue Homeostasis.  
776 *Front Immunol.* 2018;9:883.
- 777 38. Damoiseaux J. The IL-2 - IL-2 receptor pathway in health and disease: The role of the  
778 soluble IL-2 receptor. *Clin Immunol.* 2020;218:108515.
- 779 39. Morita R, Schmitt N, Bentebibel SE, Ranganathan R, Bourdery L, Zurawski G, et al.  
780 Human blood CXCR5(+)CD4(+) T cells are counterparts of T follicular cells and contain  
781 specific subsets that differentially support antibody secretion. *Immunity.* 2011;34(1):108-21.
- 782 40. Cubas R, van Grevenynghe J, Wills S, Kardava L, Santich BH, Buckner CM, et al.  
783 Reversible Reprogramming of Circulating Memory T Follicular Helper Cell Function during  
784 Chronic HIV Infection. *J Immunol.* 2015;195(12):5625-36.
- 785 41. Muir R, Metcalf T, Tardif V, Takata H, Phanuphak N, Kroon E, et al. Altered Memory  
786 Circulating T Follicular Helper-B Cell Interaction in Early Acute HIV Infection. *PLoS Pathog.*  
787 2016;12(7):e1005777.
- 788 42. Yin M, Xiong Y, Liang D, Tang H, Hong Q, Liu G, et al. Circulating Tfh cell and subsets  
789 distribution are associated with low-responsiveness to hepatitis B vaccination. *Mol Med.*  
790 2021;27(1):32.

- 791 43. Ellebedy AH, Jackson KJ, Kissick HT, Nakaya HI, Davis CW, Roskin KM, et al.  
792 Defining antigen-specific plasmablast and memory B cell subsets in human blood after viral  
793 infection or vaccination. *Nat Immunol.* 2016;17(10):1226-34.
- 794 44. Colley DG, Secor WE. Immunology of human schistosomiasis. *Parasite Immunol.*  
795 2014;36(8):347-57.
- 796 45. Boyaka PN. Inducing Mucosal IgA: A Challenge for Vaccine Adjuvants and Delivery  
797 Systems. *J Immunol.* 2017;199(1):9-16.
- 798 46. Hopkins PA, Sriskandan S. Mammalian Toll-like receptors: to immunity and beyond.  
799 *Clin Exp Immunol.* 2005;140(3):395-407.
- 800 47. Krathwohl MD, Anderson JL. Chemokine CXCL10 (IP-10) is sufficient to trigger an  
801 immune response to injected antigens in a mouse model. *Vaccine.* 2006;24(15):2987-93.
- 802 48. Majumder S, Bhattacharjee S, Paul Chowdhury B, Majumdar S. CXCL10 is critical for  
803 the generation of protective CD8 T cell response induced by antigen pulsed CpG-ODN activated  
804 dendritic cells. *PLoS One.* 2012;7(11):e48727.
- 805 49. Yan Y, Chen R, Wang X, Hu K, Huang L, Lu M, et al. CCL19 and CCR7 Expression,  
806 Signaling Pathways, and Adjuvant Functions in Viral Infection and Prevention. *Front Cell Dev*  
807 *Biol.* 2019;7:212.
- 808 50. Stubbs VE, Power C, Patel KD. Regulation of eotaxin-3/CCL26 expression in human  
809 monocytic cells. *Immunology.* 2010;130(1):74-82.
- 810 51. Kraynyak KA, Kutzler MA, Cisneros NJ, Khan AS, Draghia-Akli R, Sardesai NY, et al.  
811 Systemic immunization with CCL27/CTACK modulates immune responses at mucosal sites in  
812 mice and macaques. *Vaccine.* 2010;28(8):1942-51.
- 813 52. Dinarello CA. Overview of the IL-1 family in innate inflammation and acquired  
814 immunity. *Immunol Rev.* 2018;281(1):8-27.
- 815 53. Saraiva M, O'Garra A. The regulation of IL-10 production by immune cells. *Nat Rev*  
816 *Immunol.* 2010;10(3):170-81.
- 817 54. Barenbold O, Raso G, Coulibaly JT, N'Goran EK, Utzinger J, Vounatsou P. Estimating  
818 sensitivity of the Kato-Katz technique for the diagnosis of *Schistosoma mansoni* and hookworm  
819 in relation to infection intensity. *PLoS Negl Trop Dis.* 2017;11(10):e0005953.
- 820 55. Basch PF. *Schistosomes : development, reproduction, and host relations.* United States:  
821 New York : Oxford University Press; 1991.
- 822 56. Wirnsberger G, Hebenstreit D, Posselt G, Horejs-Hoeck J, Duschl A. IL-4 induces  
823 expression of TARC/CCL17 via two STAT6 binding sites. *Eur J Immunol.* 2006;36(7):1882-91.
- 824 57. Olatunde AC, Hale JS, Lamb TJ. Cytokine-skewed Tfh cells: functional consequences for  
825 B cell help. *Trends Immunol.* 2021;42(6):536-50.
- 826 58. Qin L, Waseem TC, Sahoo A, Bieberkezhazi S, Zhou H, Galkina EV, et al. Insights Into  
827 the Molecular Mechanisms of T Follicular Helper-Mediated Immunity and Pathology. *Front*  
828 *Immunol.* 2018;9:1884.
- 829 59. Romano A, Hou X, Sertorio M, Dessein H, Cabantous S, Oliveira P, et al. FOXP3+  
830 Regulatory T Cells in Hepatic Fibrosis and Splenomegaly Caused by *Schistosoma japonicum*:  
831 The Spleen May Be a Major Source of Tregs in Subjects with Splenomegaly. *PLoS Negl Trop*  
832 *Dis.* 2016;10(1):e0004306.
- 833 60. Musaiqwa F, Kamdem SD, Mpotje T, Mosala P, Abdel Aziz N, Herbert DR, et al.  
834 *Schistosoma mansoni* infection induces plasmablast and plasma cell death in the bone marrow  
835 and accelerates the decline of host vaccine responses. *PLoS Pathog.* 2022;18(2):e1010327.

- 836 61. Sheikh-Mohamed S, Isho B, Chao GYC, Zuo M, Cohen C, Lustig Y, et al. Systemic and  
837 mucosal IgA responses are variably induced in response to SARS-CoV-2 mRNA vaccination and  
838 are associated with protection against subsequent infection. *Mucosal Immunol.* 2022.
- 839 62. Griffith JW, Sokol CL, Luster AD. Chemokines and chemokine receptors: positioning  
840 cells for host defense and immunity. *Annu Rev Immunol.* 2014;32:659-702.
- 841 63. Liu M, Guo S, Hibbert JM, Jain V, Singh N, Wilson NO, et al. CXCL10/IP-10 in  
842 infectious diseases pathogenesis and potential therapeutic implications. *Cytokine Growth Factor*  
843 *Rev.* 2011;22(3):121-30.
- 844 64. Locci M, Havenar-Daughton C, Landais E, Wu J, Kroenke MA, Arlehamn CL, et al.  
845 Human circulating PD-1+CXCR3-CXCR5+ memory Tfh cells are highly functional and  
846 correlate with broadly neutralizing HIV antibody responses. *Immunity.* 2013;39(4):758-69.
- 847 65. Bentebibel SE, Khurana S, Schmitt N, Kurup P, Mueller C, Obermoser G, et al.  
848 ICOS(+)/PD-1(+)/CXCR3(+) T follicular helper cells contribute to the generation of high-avidity  
849 antibodies following influenza vaccination. *Sci Rep.* 2016;6:26494.
- 850 66. Zhang J, Liu W, Wen B, Xie T, Tang P, Hu Y, et al. Circulating CXCR3(+) Tfh cells  
851 positively correlate with neutralizing antibody responses in HCV-infected patients. *Sci Rep.*  
852 2019;9(1):10090.
- 853 67. Bergamaschi C, Terpos E, Rosati M, Angel M, Bear J, Stellas D, et al. Systemic IL-15,  
854 IFN-gamma, and IP-10/CXCL10 signature associated with effective immune response to SARS-  
855 CoV-2 in BNT162b2 mRNA vaccine recipients. *Cell Rep.* 2021;36(6):109504.
- 856 68. Goncalves E, Bonduelle O, Soria A, Loulergue P, Rousseau A, Cachanado M, et al.  
857 Innate gene signature distinguishes humoral versus cytotoxic responses to influenza vaccination.  
858 *J Clin Invest.* 2019;129(5):1960-71.
- 859 69. Rechtien A, Richert L, Lorenzo H, Martrus G, Hejblum B, Dahlke C, et al. Systems  
860 Vaccinology Identifies an Early Innate Immune Signature as a Correlate of Antibody Responses  
861 to the Ebola Vaccine rVSV-ZEBOV. *Cell Rep.* 2017;20(9):2251-61.
- 862 70. Nono JK, Mpotje T, Mosala P, Aziz NA, Musaigwa F, Hlaka L, et al. Praziquantel  
863 Treatment of *Schistosoma mansoni* Infected Mice Renders Them Less Susceptible to  
864 Reinfection. *Front Immunol.* 2021;12:748387.
- 865 71. Dzihvhuho GA, Rehrl SA, Ndlovu H, Horsnell WGC, Brombacher F, Williamson AL, et  
866 al. Chronic schistosomiasis suppresses HIV-specific responses to DNA-MVA and MVA-gp140  
867 Env vaccine regimens despite antihelminthic treatment and increases helminth-associated  
868 pathology in a mouse model. *PLoS Pathog.* 2018;14(7):e1007182.
- 869 72. Attallah AM, Ghanem GE, Ismail H, El Waseef AM. Placental and oral delivery of  
870 *Schistosoma mansoni* antigen from infected mothers to their newborns and children. *Am J Trop*  
871 *Med Hyg.* 2003;68(6):647-51.
- 872 73. Ghaffar YA, Kamel M, el-Sobky M, Bahnasy R, Strickland GT. Response to hepatitis B  
873 vaccine in infants born to mothers with schistosomiasis. *Lancet.* 1989;2(8657):272.
- 874 74. Malhotra I, LaBeaud AD, Morris N, McKibben M, Mungai P, Muchiri E, et al. Cord  
875 Blood Antiparasite Interleukin 10 as a Risk Marker for Compromised Vaccine Immunogenicity  
876 in Early Childhood. *J Infect Dis.* 2018;217(9):1426-34.
- 877 75. Ondigo BN, Muok EMO, Oguso JK, Njenga SM, Kanyi HM, Ndombi EM, et al. Impact  
878 of Mothers' Schistosomiasis Status During Gestation on Children's IgG Antibody Responses to  
879 Routine Vaccines 2 Years Later and Anti-Schistosome and Anti-Malarial Responses by  
880 Neonates in Western Kenya. *Front Immunol.* 2018;9:1402.

- 881 76. Mewamba EM, Nyangiri OA, Noyes HA, Egesa M, Matovu E, Simo G. The Genetics of  
882 Human Schistosomiasis Infection Intensity and Liver Disease: A Review. *Front Immunol.*  
883 2021;12:613468.
- 884 77. Lund AJ, Sokolow SH, Jones IJ, Wood CL, Ali S, Chamberlin A, et al. Exposure, hazard,  
885 and vulnerability all contribute to *Schistosoma haematobium* re-infection in northern Senegal.  
886 *PLoS Negl Trop Dis.* 2021;15(10):e0009806.
- 887 78. Nkurunungi G, Zirimenya L, Nassuuna J, Natukunda A, Kabuubi PN, Niwagaba E, et al.  
888 Effect of intensive treatment for schistosomiasis on immune responses to vaccines among rural  
889 Ugandan island adolescents: randomised controlled trial protocol A for the 'POPulation  
890 differences in VACcine responses' (POPVAC) programme. *BMJ Open.* 2021;11(2):e040426.
- 891 79. Nkurunungi G, Zirimenya L, Natukunda A, Nassuuna J, Oduru G, Ninsiima C, et al.  
892 Population differences in vaccine responses (POPVAC): scientific rationale and cross-cutting  
893 analyses for three linked, randomised controlled trials assessing the role, reversibility and  
894 mediators of immunomodulation by chronic infections in the tropics. *BMJ Open.*  
895 2021;11(2):e040425.
- 896 80. Corstjens PL, Li S, Zuiderwijk M, Kardos K, Abrams WR, Niedbala RS, et al. Infrared  
897 up-converting phosphors for bioassays. *IEE Proc Nanobiotechnol.* 2005;152(2):64-72.
- 898 81. Metcalf TU, Cubas RA, Ghneim K, Cartwright MJ, Grevenynghe JV, Richner JM, et al.  
899 Global analyses revealed age-related alterations in innate immune responses after stimulation of  
900 pathogen recognition receptors. *Aging Cell.* 2015;14(3):421-32.
- 901 82. Brown EP, Licht AF, Dugast AS, Choi I, Bailey-Kellogg C, Alter G, et al. High-  
902 throughput, multiplexed IgG subclassing of antigen-specific antibodies from clinical samples. *J*  
903 *Immunol Methods.* 2012;386(1-2):117-23.
- 904 83. Cinelli CaHC. Making sense of sensitivity: extending omitted  
905 variable bias. *Journal of the Royal Statistical Society Series B (Statistical Methodology).*  
906 2020;82(1):39-67.
- 907

## 908 **Figure captions**

909 **Fig 1. Clinical study design.** Participants enrolled in the clinical study (n =79, four donor samples were  
910 unavailable for analysis in this study) were vaccinated at baseline [(pre-vaccination) day 0 (D0)] and  
911 received two boosters at month 1 (M1) and month 6 (M6). Individuals provided sera samples at D0,  
912 month 7 post-vaccination (M7) (one month post-booster 2) and month 12 post-vaccination (M12) (six  
913 months post-booster 2), which were used to screen for Hepatitis B (HepB) antibody titers. Enrollees were  
914 treated at day 12 post-vaccination (D12) with Praziquantel (PZQ) as appropriate, for egg counts detected  
915 in stool samples which were collected at D0 (and day 3 and/or day 7). Sera samples at D0 were also used  
916 to evaluate for schistosome-specific antigen (circulating anodic antigen, CAA). PMBCs and plasma were



917 also collected at D0, D12, M7 and M12 for subsequent analysis. X denotes corresponding samples  
918 collected at that timepoint.

919

920 **Fig 2. Higher CAA concentration pre-vaccination is associated with a reduction in Hepatitis B**

921 **vaccine titers.** (A) Density of Schistosome-specific antigen values (CAA [pg/ml]) analyzed in serum

922 samples from participants pre-vaccination (D0). A binomial distribution was fitted to the CAA values and

923 a maximum-likelihood was used to identify the optimum cutoff separating the two modes of the CAA

924 values. Two groups of participants were then identified based on CAA values, low CAA (<36pg/mL

925 CAA), n =41; and high CAA ( $\geq$ 36pg/mL CAA), n =33. Male (blue line), n =53; Female (red line), n =21

926 (B) Hepatitis B (HepB) titers (log pg/mL) determined by commercial immunoassays for individuals at

927 M7 post-vaccination plotted to compare low and high CAA. Participants were further defined based on

928 CAA concentration values using methodology from the CAA assay that allowed detection of samples as

929 low as 3pg/mL: non-infected [no] (<3pg/mL CAA), low CAA [low] (3-100 pg/mL CAA), and high CAA

930 [high] (>100pg/mL CAA) (C) HepB titers for individuals at Month 7 post-vaccination, non-infected, n

931 =16, low CAA, n =26 and high CAA, n =22 and (D) Month 12 post-vaccination, non-infected, n =14, low

932 CAA, n =23, and high CAA, n =19 plotted to compare CAA. Boxplots show median values (horizontal

933 line), interquartile range (box) and 95% confidence interval (whiskers).

934

935 **Fig 3. Elevated levels of plasma cytokines/chemokines involved in lymphocyte cell migration and**

936 **activation pre-vaccination in individuals with *S. mansoni* infection persist at month 12 post-**

937 **vaccination.** (A) CCL17, (B) CCL19, and (C) CXCL9 levels in the plasma of non-infected individuals

938 pre-vaccination (D0), n =19, low CAA, n =32, and high CAA, n =24, and M12 post-vaccination, n =15,

939 low CAA, n =29, and high CAA, n =19. Data shown as  $\pm$  SEM. \*  $P \leq 0.05$ . Wilcoxon rank-sum test

940 performed on non-infected vs. low CAA, or non-infected vs. high CAA, or low CAA vs. high CAA

941 within each time point D0 or M12. Non-infected- light grey, low CAA - blue, and high CAA - dark grey.

942 (D) Principal component analysis of plasma cytokines/chemokines pre-vaccination and after Hepatitis B

943 vaccination was conducted and the first (PC1) and second (PC2) principal components were used to plot  
944 samples based on their plasma cytokines/chemokines profiles. Each dot corresponds to a sample and  
945 colors denote the timepoint the sample was collected: D0- red, D3- green, D7- blue, and M12- purple.

946

947 **Fig 4. Frequencies of circulating follicular helper (cTfh) cells are lower pre- and post-vaccination in**

948 ***S. mansoni* infection with concurrent higher frequencies of regulatory T cells (Tregs) in individuals**

949 **with high CAA concentration.** Frequencies of CD3<sup>+</sup>CD4<sup>+</sup>CD45RA<sup>-</sup>CD25<sup>-</sup>CXCR5<sup>+</sup>, populations: (A)

950 cTfh1 [CXCR3<sup>+</sup>], (B) cTfh2 [CXCR3<sup>-</sup>CCR6<sup>-</sup>], (C) cTfh17 [CXCR3<sup>-</sup>CCR6<sup>+</sup>], (D) non cTfh

951 [CD3<sup>+</sup>CD4<sup>+</sup>CD45RA<sup>-</sup>CD25<sup>-</sup>CXCR5<sup>-</sup>] and (E) CXCR5<sup>-</sup>Tregs [CD3<sup>+</sup>CD4<sup>+</sup>CD45RA<sup>-</sup>CD127<sup>-</sup>

952 CD25<sup>+</sup>Foxp3<sup>+</sup>CXCR5<sup>-</sup>] were identified by flow cytometry of PBMCs from individuals pre-vaccination

953 (D0) non-infected, n =19, low CAA, n =31, and high CAA, n =25, M7 post-vaccination non-infected, n

954 =14, low CAA, n =17, and high CAA, n =20, and M12 post-vaccination non-infected, n =16, low CAA, n

955 =24, and high CAA, n =20. Data shown as ± SEM. \*P ≤ 0.05. Wilcoxon rank-sum test performed on non-

956 infected vs. low CAA, or non-infected vs. high CAA, or low CAA vs. high CAA for each time point

957 separately D0, M7, or M12. Non-infected- light grey, low CAA - blue, and high CAA - dark grey.

958

959 **Fig 5. Frequencies of antibody secreting cells (ASCs) are lower at month 12 post-vaccination in**

960 **individuals with high CAA concentration.** Frequencies of (A) KI67<sup>+</sup> ASCs [CD19<sup>+</sup>CD10<sup>-</sup>IgD<sup>-</sup>

961 CD71<sup>+</sup>CD38<sup>+</sup>CD20<sup>-</sup>], (B) IgG<sup>+</sup> ASCs, and (C) IgA<sup>+</sup> ASCs, were identified by flow cytometry of PBMCs

962 from individuals pre-vaccination (D0 ) non-infected, n =16, low CAA, n =29, and high CAA, n =24, M7

963 post-vaccination non-infected, n =14, low CAA, n =17, and high CAA, n =20, and M12 post-vaccination

964 non-infected, n =16, low CAA, n =23, and high CAA, n =21. Data shown as ± SEM. \* P ≤ 0.05.

965 Wilcoxon rank-sum test performed on non-infected vs. low CAA, or non-infected vs. high CAA, or low

966 CAA vs. high CAA for each time point separately D0, M7, or M12. Non-infected- light grey, low CAA -

967 blue, and high CAA - dark grey.

968

969 **Fig 6. Changes in the Ig isotype profile are evident in *S. mansoni* infection pre- and post-vaccination**  
970 **in response to TLR9 stimulation.** (A) IgG4 levels pre-vaccination (D0), and (C) IgA levels at M12 post-  
971 vaccination in the culture supernatant of PBMCs stimulated for 7 days with CpG (CpG-ODN [TLR9]) or  
972 UNT (untreated). D0 non-infected, n =14, low CAA, n =27, and high CAA, n =21, and M12 post-  
973 vaccination non-infected, n =10, low CAA, n =20, and high CAA, n =17. Data shown as  $\pm$  SEM. \*  $P \leq$   
974 0.05. Wilcoxon matched-pairs signed rank test performed on UNT vs. CpG for each non-infected, or low  
975 CAA, or high CAA, and within the CpG-treated group a Wilcoxon rank-sum test on non-infected vs. low  
976 CAA, or non-infected vs. high CAA, or low CAA vs. high CAA. Non-infected- light grey, low CAA -  
977 blue, and high CAA - dark grey. (B) The mean Florescence intensity (MFI) of serum *S. mansoni*-specific  
978 IgG4 at D0 non-infected [no], n =15, low CAA [low], n =21, and high CAA [high], n =20). A student t-  
979 test was used to evaluate for the significance of the correlation.  $P \leq 0.05$  was considered significant.

980  
981 **Fig 7. Hepatitis B peptide-specific memory CD4<sup>+</sup> T cells positively correlate with Hepatitis B titers**  
982 **at month 7 post-vaccination, with a concurrent negative correlation for Hepatitis B peptide-specific**  
983 **memory CD8<sup>+</sup> T cells.** Frequencies of CFSE<sup>-</sup> (A) CD4<sup>+</sup>CD45RA<sup>-</sup> memory T (CD4<sup>+</sup> mem), and (B)  
984 CD8<sup>+</sup>CD45RA<sup>-</sup> memory T cells (CD8<sup>+</sup> mem), were identified by flow cytometry of PBMCs from  
985 individuals at M7 post vaccination non-infected, n =12, low CAA, n =10, and high CAA, n =15, that were  
986 stimulated for 6 days with hepatitis B long envelope protein peptide (HBV LEP) or DMSO control  
987 (control). Data shown as  $\pm$  SEM. \*  $P \leq 0.05$ . Wilcoxon matched-pairs signed rank test performed on  
988 control vs. HBV LEP for each non-infected, or low CAA, or high CAA, and within the HBV-LEP-treated  
989 group a Wilcoxon rank-sum test on non-infected vs. low CAA, or non-infected vs. high CAA, or low  
990 CAA vs. high CAA within the CpG-treated. Non-infected- light grey, low CAA - blue, and high CAA -  
991 dark grey. (C) Linear regressions were fit between Hepatitis B titers and CFSE<sup>-</sup> (C) CD4<sup>+</sup> mem, and (D)  
992 CD8<sup>+</sup> mem T cell populations adjusted for sex and student t-tests were used to evaluate for the  
993 significance of the association. t (t-statistic).  $P \leq 0.05$  was considered significant. (Shape: triangle-Male,  
994 circle-Female; color: grey- non-infected, black- low CAA, blue- high CAA).

995

996 **Fig 8. Monocyte function is important in and significantly correlate with Hepatitis B vaccine**  
997 **responses.** Antibody-dependent cellular phagocytosis (ADCP) assays with serum from individuals pre-  
998 vaccination, non-infected, n =14, low CAA, n =20, and high CAA, n =18, were conducted with cells from  
999 the monocyte cell line THP-1. Scatter plots show HBsAg-specific ADCP associations with (A) Hepatitis  
1000 B titers at M12, and with (B) HBsAg-specific IgG1, and (C) HbsAg-specific antibody binding to  
1001 FcγR3A (CD16) expression determined by antibody subclass and Fc receptor binding assays using serum  
1002 samples from pre-vaccinated individuals. Spearman correlation and t-test were used to evaluate for the  
1003 significance of the correlation. *coef* (regression coefficient). *t* (t-statistic).  $P \leq 0.05$  was considered  
1004 significant. (Shape: triangle-Male, circle-Female; color: grey- non-infected, black- low CAA, blue- high  
1005 CAA).

1006

1007 **Fig 9. Lower levels of cytokines/chemokines important in the activation and maturation of innate**  
1008 **immune cells in *S. mansoni*-infected individuals pre-vaccination and day 12 post-vaccination.** (A)  
1009 CXCL10 levels pre-vaccination (D0) non-infected, n =19, low CAA, n =31, and high CAA, n =25, and  
1010 (B) CCL19, (C) CCL26, (D) CCL27, (E) IL-1 $\beta$ , and (F) IL-10 levels at D12 post vaccination non-  
1011 infected, n =15, low CAA, n =26, and high CAA, n =23], in the culture supernatant of PBMCs stimulated  
1012 for 18 hours with CLO97 (TLR7/8 agonist) or untreated (UNT). Data shown as  $\pm$  SEM. \*  $P \leq 0.05$   
1013 Wilcoxon matched-pairs signed rank test performed on UNT vs. CLO97 or each non-infected, or low  
1014 CAA, or high CAA, and within the CLO97-treated group a Wilcoxon rank-sum test on non-infected vs.  
1015 low CAA, or non-infected vs. high CAA, or low CAA vs. high CAA. Non-infected- light grey, low CAA  
1016 - blue, and high CAA - dark grey.

1017

## 1018 **Supporting information captions**

1019 **S1 Fig. Elevated plasma cytokines/chemokines in *S. mansoni*-infected individuals pre-vaccination.**  
1020 (A) CCL7, (B) CCL11, (C) CCL22, (D) CCL24, (E) IL-2, and (F) M-CSF levels in the plasma of non-

1021 infected, n = 19, low CAA, n = 32, and high CAA, n = 24, individuals pre-vaccination (day 0). Data  
1022 shown as  $\pm$  SEM. \*  $P \leq 0.05$ . Wilcoxon rank-sum test performed on non-infected vs low CAA, or non-  
1023 infected vs high CAA, or low CAA vs high CAA for each time point separately. Non-infected- light grey,  
1024 low CAA - blue, and high CAA - dark grey.

1025

1026 **S2 Fig. CCL17 and soluble IL-2R levels in individuals with *S. mansoni* infection correlate with**

1027 **Hepatitis B titers post-vaccination.** Scatter plots of Hepatitis B titers at M12 as a function of (A-B)

1028 CCL17 and (D-E) soluble IL-2R cytokine levels in the plasma of non-infected participants at D0, n =19,

1029 low CAA, n =32, and high CAA, n =24, and M12 post-vaccination, n =15, low CAA, n =29, and high

1030 CAA, n =19.  $P \leq 0.05$ . Linear regressions were fit between Hepatitis B titers and the cytokines adjusted

1031 for sex and student t-tests were used to evaluate for the significance of the association. t (t-statistic).  $P \leq$

1032 0.05 was considered significant. (Shape: circle-females, triangle-males; color: grey- non-infected, black-

1033 low CAA, blue- high CAA). (C) Soluble IL-2R levels in the plasma of non-infected individuals pre-

1034 vaccination (D0), n =19, low CAA, n =32, and high CAA, n =24, and M12 post-vaccination, n =15, low

1035 CAA, n =29, and high CAA, n =19. Non-infected- light grey, low CAA - blue, and high CAA - dark grey.

1036

1037 **S3 Fig. Flow cytometry gating strategy for T cell populations.** Representative plots showing non-

1038 circulating T follicular helper cells (cTfh) populations as  $CD3^+CD4^+CD45RA^-CD25^-CXCR5^-$  and cTfh

1039 populations as  $CD3^+CD4^+CD45RA^-CD25^-CXCR5^+$ , identifying cTfh1 as  $CXCR3^+$ , cTfh2 as  $CXCR3^-$

1040  $CCR6^-$ , and cTfh17 as  $CXCR3^-CCR6^+$ . Regulatory T cells (Tregs) were identified as

1041  $CD3^+CD4^+CD45RA^-CD127^-CD25^+Foxp3^+$ .

1042

1043 **S4 Fig. Flow cytometry gating strategy for B cell populations.** Representative plots showing activated

1044 B cells (ABC) as  $CD19^+CD10^-IgD^-CD71^+CD38^-CD20^+$  and antibody secreting B cells (ASC) as

1045  $CD19^+CD10^-IgD^-CD71^+CD38^+CD20^-$ .

1046

1047 **S5 Fig. Frequencies of Activated B cells (ABC) were elevated in *S. mansoni* infection pre- and post-**  
1048 **vaccination.** Frequencies of (A) ABCs [CD19<sup>+</sup>CD10<sup>-</sup>IgD<sup>-</sup>CD71<sup>+</sup>CD38<sup>-</sup>CD20<sup>+</sup>], and (B) IgG<sup>+</sup> ABCs,  
1049 were identified by flow cytometry of PBMCs from individuals pre-vaccination (D0) non-infected, n = 16,  
1050 low CAA, n = 29, and high CAA, n = 24], M7 post-vaccination non-infected, n = 14, low CAA, n = 17,  
1051 and high CAA, n = 20, and M12 post-vaccination non-infected, n = 16, low CAA, n = 23, and high CAA,  
1052 n = 21. Data shown as ± SEM. \* P ≤ 0.05. Wilcoxon rank-sum test performed on non-infected vs low  
1053 CAA, or non-infected vs high CAA, or low CAA vs high CAA for each time point separately D0, M7, or  
1054 M12. Non-infected- light grey, low CAA - blue, and high CAA - dark grey. (C) Linear regressions were  
1055 fit between Hepatitis B titers and IgA<sup>+</sup> ASCs adjusted for sex and student t-tests were used to evaluate for  
1056 the significance of the association. t (t-statistic). P ≤ 0.05 was considered significant. (Shape: triangle-  
1057 Male, circle-Female; color: grey- non-infected, black- low CAA, blue- high CAA).

1058  
1059 **S6 Fig. Plasma IgE is elevated pre-vaccination and remains elevated at month 12 post-vaccination**  
1060 **in *S. mansoni*-infected individuals.** Plasma IgE levels pre-vaccination (D0) and M12 post-vaccination.  
1061 D0 non-infected, n = 17, low CAA, n = 20, and high CAA, n = 19], and M12 post-vaccination non-  
1062 infected, n = 15, low CAA, n = 26, and high CAA, n = 20. Data shown as ± SEM. \* P ≤ 0.05. Wilcoxon  
1063 rank-sum test performed on non-infected vs low CAA, or non-infected vs high CAA, or low CAA vs high  
1064 CAA for each time point separately D0, or M12. Non-infected- light grey, low CAA - blue, and high  
1065 CAA - dark grey.

1066  
1067 **S7 Fig. Flow cytometry gating strategy for monocyte populations.** Representative plots showing non-  
1068 classical (NC) monocytes as CD3<sup>-</sup>CD19<sup>-</sup>CD14<sup>dim</sup>CD16<sup>+</sup>, classical monocytes (CL) as CD3<sup>-</sup>CD19<sup>-</sup>  
1069 CD14<sup>+</sup>CD16<sup>+</sup>, and intermediate monocytes (INT) as CD3<sup>-</sup>CD19<sup>-</sup>CD14<sup>+</sup>CD16<sup>-</sup>.

1070  
1071 **S8 Fig. Flow cytometry gating strategy for monocyte populations.** Frequencies of monocyte  
1072 populations (A) (classical [CD3<sup>-</sup>CD19<sup>-</sup>CD14<sup>+</sup>CD16<sup>+</sup>], (B) intermediate [CD3<sup>-</sup>CD19<sup>-</sup>CD14<sup>+</sup>CD16<sup>-</sup>], and

1073 (C) non-classical [CD3<sup>-</sup>CD19<sup>-</sup>CD14<sup>dim</sup>CD16<sup>+</sup>] were identified by flow cytometry of PBMCs from  
1074 individuals pre-vaccination, non-infected, n =14, low CAA, n =20, and high CAA, n =18. Non-infected-  
1075 light grey, low CAA - blue, and high CAA - dark grey. (D-F) Scatter plot showing the frequencies of  
1076 monocytes subsets as a function of Hepatitis B titers at M7 post-vaccination. Linear regressions were fit  
1077 between Hepatitis B titers and the monocyte subset frequencies adjusted for sex and experiment batch,  
1078 and student t-tests were used to evaluate for the significance of the association. Spearman correlation and  
1079 t-test were used to evaluate for the significance of the correlation. *coef* (regression coefficient), *t* (t-  
1080 statistic).  $P \leq 0.05$  was considered significant.

1081

1082 **S1 Table.** Study participant information.

1083

1084 **S2 Table.** Statistical information for plasma Luminex cytokine/chemokine levels.

1085

1086 **S3 Table.** Sensitivity analysis for plasma Luminex cytokine/chemokine levels correlated with Hepatitis B  
1087 titers.

1088

1089 **S4 Table.** Statistical information for Frequency of T cells.

1090

1091 **S5 Table.** Statistical information for Frequency of B cells.

1092

1093 **S6 Table.** Sensitivity analysis for B cell flow cytometry frequencies correlated with Hepatitis B titers.

1094

1095 **S7 Table.** Statistical information for supernatant cytokine/chemokine levels from CLO97-stimulated  
1096 PBMCs.

1097

1098 **S8 Table.** Ex vivo T cell staining panel for PBMCs.

1099

1100 **S9 Table.** Ex vivo B cell staining panel for PBMCs.

1101

1102 **S10 Table.** T cell staining panel for PBMCs after Hepatitis B peptide stimulation.



| Day (D)<br>Month (M)       | D0                                                                                                                           | D12                                                                                                   | M1                                                                                                     | M6                                                                                                             | M7                                                                                                             | M12                                                                                                                             |                                                                                                                                   |
|----------------------------|------------------------------------------------------------------------------------------------------------------------------|-------------------------------------------------------------------------------------------------------|--------------------------------------------------------------------------------------------------------|----------------------------------------------------------------------------------------------------------------|----------------------------------------------------------------------------------------------------------------|---------------------------------------------------------------------------------------------------------------------------------|-----------------------------------------------------------------------------------------------------------------------------------|
|                            | <br>Pre-vaccine<br>Baseline<br><i>n</i> =79 | <br>Hep B<br>Vaccine | <br>Worm<br>Treatment | <br>Hep B<br>Vaccine<br>Boost | <br>Hep B<br>Vaccine<br>Boost | <br>1 month post<br>2nd Boost<br><i>n</i> =64 | <br>6 months post<br>2nd Boost<br><i>n</i> =64 |
| HepB Ab<br>Titers          | X                                                                                                                            |                                                                                                       |                                                                                                        |                                                                                                                | X                                                                                                              | X                                                                                                                               |                                                                                                                                   |
| CAA                        | X                                                                                                                            |                                                                                                       |                                                                                                        |                                                                                                                |                                                                                                                |                                                                                                                                 |                                                                                                                                   |
| Harvest<br>PBMCs<br>Plasma | X                                                                                                                            | X                                                                                                     |                                                                                                        |                                                                                                                | X                                                                                                              | X                                                                                                                               |                                                                                                                                   |

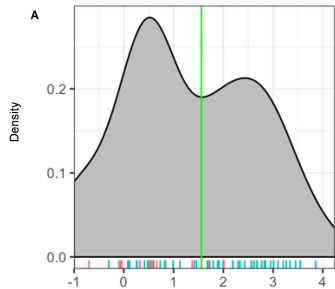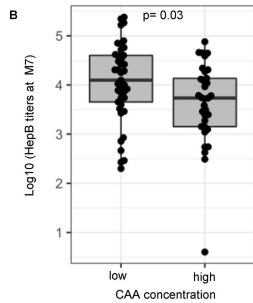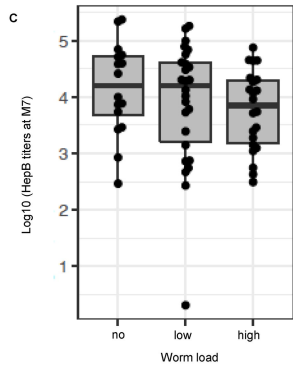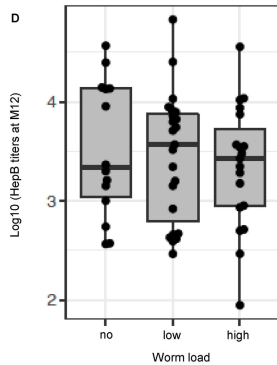

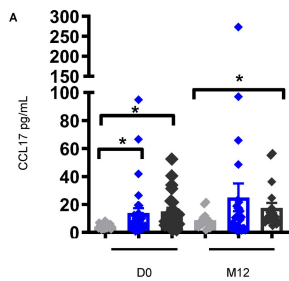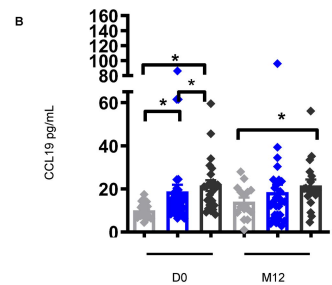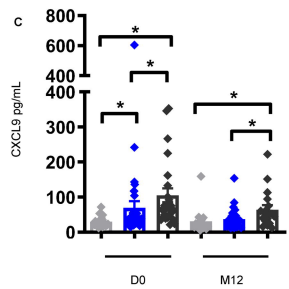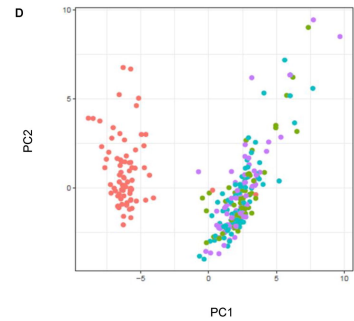

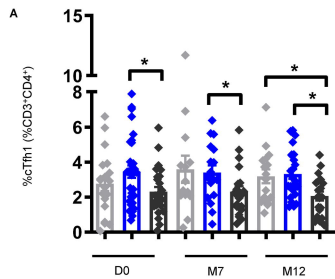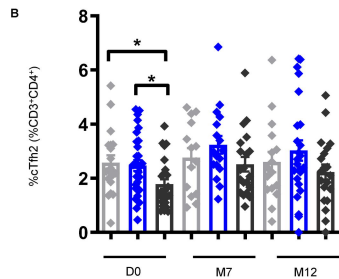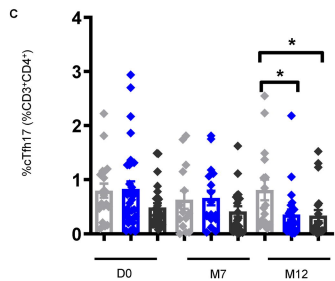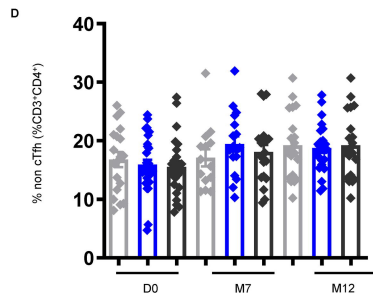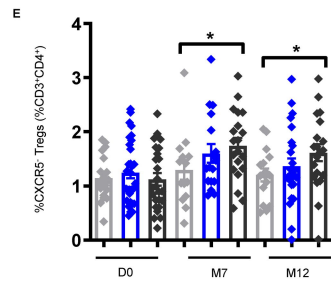

**A**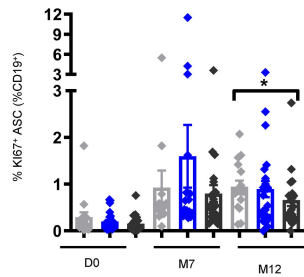**B**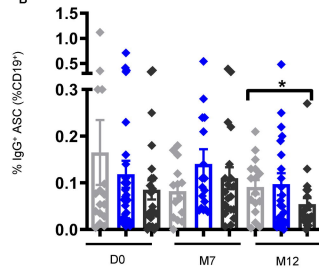**C**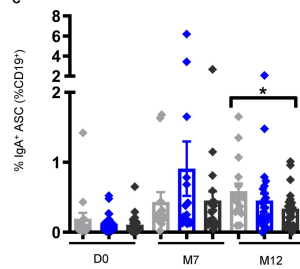

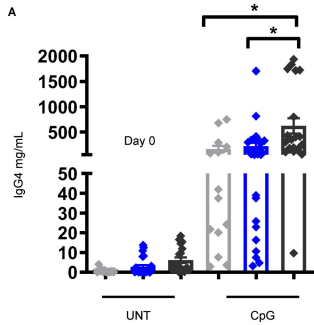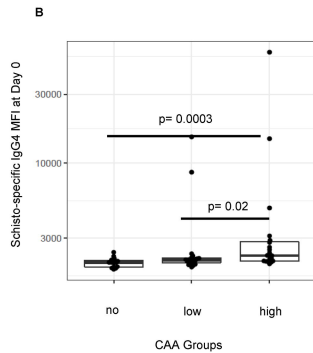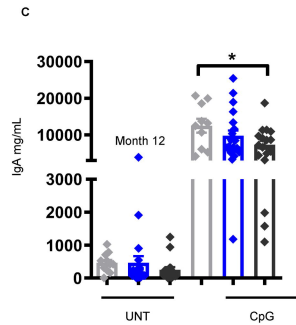

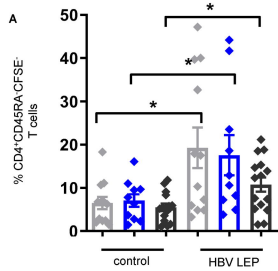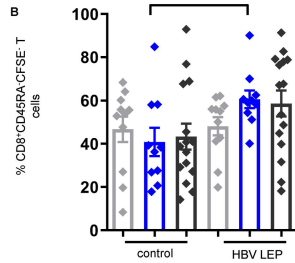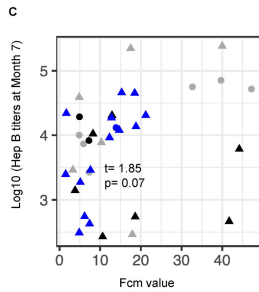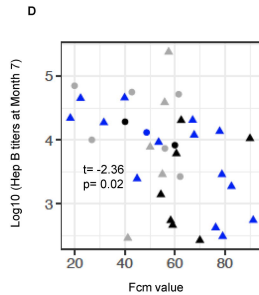

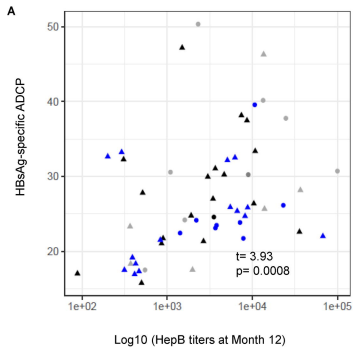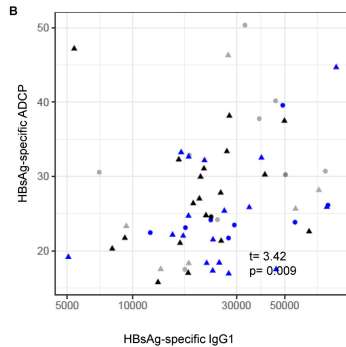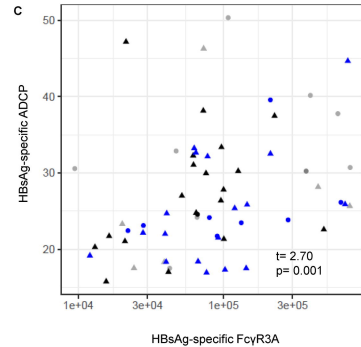



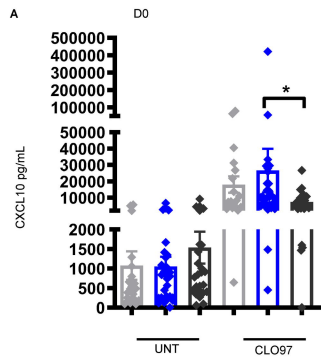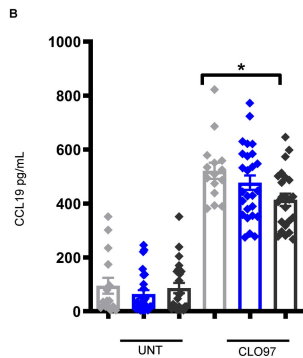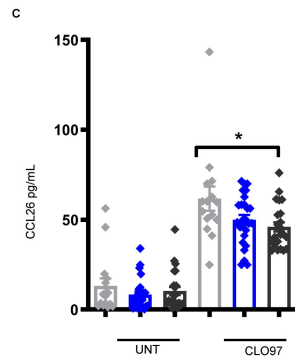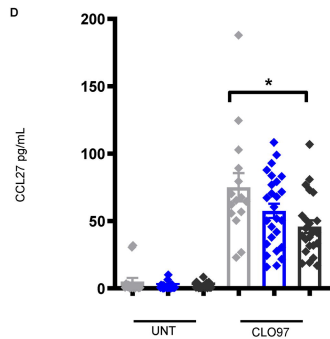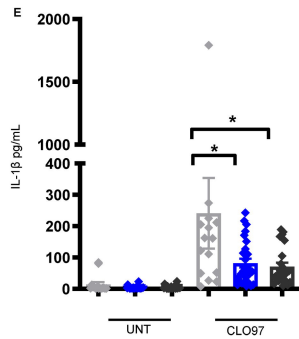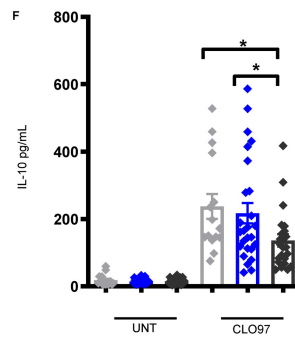

Source: https://medrxiv.org/content/10.1101/2023.02.24.23284435v1.full.pdf
